# **Spectral tuning of adaptation supports coding of sensory context in auditory cortex**

Mateo Lopez Espejo<sup>1</sup>, Zachary P. Schwartz<sup>1</sup>, Stephen V. David<sup>2</sup>

<sup>1</sup>Neuroscience Graduate Program, <sup>2</sup>Oregon Hearing Research Center,  
Oregon Health and Science University

Correspondence: SVD, 3181 SW Sam Jackson Park Road, MC L335A, Portland, OR 97239. Email:  
davids@ohsu.edu

**Running title:** Spectral tuning of adaptation in auditory cortex

**Pages:** 53

**Figures:** 9

**Word count:** Abstract: 272, Author summary: 142

**Conflict of interest:** None

## **Acknowledgements**

This work was supported by grants from the National Institutes of Health (R01 DC014950, F31 DC016204), the Defense Advanced Research Projects Agency (D15AP00101), and a fellowship from the ARCS Foundation Oregon Chapter. The authors would like to thank Henry Cooney, Sean Slee, and Daniela Saderi for assistance with behavioral training and neurophysiological recording. The authors declare no competing financial interests.

# **Abstract**

Perception of vocalizations and other behaviorally relevant sounds requires integrating acoustic information over hundreds of milliseconds, but the latency of sound-evoked activity in auditory cortex typically has much shorter latency. It has been observed that the acoustic context, i.e., sound history, can modulate sound evoked activity. Contextual effects are attributed to modulatory phenomena, such as stimulus-specific adaption and contrast gain control. However, an encoding model that links context to natural sound processing has yet to be established. We tested whether a model in which spectrally tuned inputs undergo adaptation mimicking short-term synaptic plasticity can account for contextual effects during natural sound processing. Single-unit activity was recorded from primary auditory cortex of awake ferrets during presentation of noise with natural temporal dynamics and fully natural sounds. Encoding properties were characterized by a standard linear-nonlinear spectro-temporal receptive field model (LN STRF) and STRF variants that incorporated STP-like adaptation. In two models, STP was applied either globally across all spectral channels or locally to subsets of channels. For most neurons, STRFs incorporating locally tuned STP predicted neural activity as well or better than the LN and global STP STRF. The strength of nonlinear adaptation varied across neurons. Within neurons, adaptation was generally stronger for activation with excitatory than inhibitory gain. Neurons showing improved STP model performance also tended to undergo stimulus-specific adaptation, suggesting a common mechanism for these phenomena. When STP STRFs were compared between passive and active behavior conditions, response gain often changed, but average STP parameters were stable. Thus, spectrally and temporally heterogeneous adaptation, subserved by a mechanism with STP-like dynamics, may support representation of the diverse spectro-temporal patterns that comprise natural sounds.

## **Author summary**

Successfully discriminating between behaviorally relevant sounds such as vocalizations and environmental noise requires processing how acoustic information changes over many tens to hundreds of milliseconds. The sound-evoked activity measured for most auditory cortical neurons is relatively short ( $< 50$  ms), so it is not clear how the auditory cortex encodes sound information over longer periods. In this study, we propose that nonlinear adaptation, mimicking the effects of short-term synaptic plasticity (STP), enables auditory neurons to encode longer and more complex spectro-temporal patterns. A model in which sound history is stored in the latent state of plastic synapses is able to describe responses of single cortical neurons to natural sounds better than a standard encoding model that does not include nonlinear adaptation. Moreover, STP-like adaptation can account for contextual effects on sound evoked activity that cannot be accounted for by standard encoding models.

# **Introduction**

Vocalizations and other natural sounds are characterized by complex spectro-temporal patterns. Discriminating sounds like speech syllables requires integrating information about changes in frequency content over many tens to hundreds of milliseconds [1–3]. Standard models of sensory encoding for auditory neurons, such as the linear spectro-temporal receptive field (STRF), generally characterize response properties with relatively short latencies (20–50 ms), which prevents them from encoding anything about stimuli over a longer period of time [4,5]. It remains an open question how the auditory system integrates spectro-temporal information over longer periods.

Classic STRF models cannot account for integration over longer timescales, but studies of spectro-temporal context have shown that auditory-evoked activity can be modulated by stimuli occurring hundreds to thousands of milliseconds beforehand [6–8]. These results have generally been interpreted in the context of pop-out effects for oddball stimuli [9,10] or gain control to normalize neural activity in the steady state [11–13]. Encoding models that incorporate gain control or nonlinear adaptation have been shown to provide better characterization of auditory-evoked activity in the steady state, indicating that these properties of neurons may contribute to context-dependent coding on these longer timescales [14–17].

Short-term synaptic plasticity (STP) is a widely-observed phenomenon in the mammalian brain. Upon sustained stimulation, the efficacy of synapses is depressed or facilitated until stimulation ceases and synaptic resources are allowed to return to baseline [18]. As sensory inputs converge in the neural processing hierarchy, synapses can undergo different degrees of plasticity, which depend on the specific pattern of stimulation. We hypothesized that nonlinear adaptation with STP-like properties may play a general role in auditory processing. While the precise mechanism producing nonlinear adaptation can take other forms than STP (e.g., feedforward inhibition, postsynaptic inhibition [19,20]), all these mechanisms can support a similar algorithm for encoding spectro-temporal features. The focus of this study is whether functional properties of auditory neurons are impacted significantly by such a mechanism at the algorithmic

level. Regardless of precise mechanism, a population of neurons with spectrally tuned adaptation may support a rich code for information over the many hundreds of milliseconds required to discriminate spectro-temporally complex natural sounds [21].

To test for spectrally-tuned adaptation, we developed a stimulus in which two independently modulated narrowband noise stimuli were presented in the receptive field of neurons recorded in primary auditory cortex (A1) of awake ferrets. We then used the approach of comparing the prediction accuracy of neural encoding models to test for STP-like effects [22,23]. We fit an encoding model based on the STRF, in which inputs adapted either locally to one spectral band or globally across all channels. For many neurons, locally tuned adaptation provided a more accurate prediction of neural activity, supporting the idea of channel-specific adaptation. The strength and tuning of adaptation was heterogeneous across the A1 population, consistent with the idea that a diversity of spectrally tuned adaptation supports a rich basis for encoding complex natural sounds. We observed the same pattern of results for models fit to a library of fully natural sounds.

We also asked how changes in behavioral state, which can influence response gain and selectivity, affected nonlinear adaptation properties in A1 [24–30]. We compared model STP parameters between passive listening and during a behavior that required detecting a tone in a natural noise stream. While the gain of the neural response could fluctuate substantially with behavioral state, STP was largely stable across behavior conditions. This finding suggests that, unlike response gain, nonlinear adaptation properties are not influenced by behavioral state and may instead be critical for stable encoding of spectro-temporal sound features [21,31].

# **Results**

## **Encoding models reveal spectrally tuned adaptation in primary auditory cortex**

This study characterized how primary auditory cortex (A1) integrated information from dynamic, naturalistic stimuli over time and frequency. Data were recorded from 200 single units in A1 of 5 passively listening ferrets during presentation of two band vocalization-modulated noise (Fig. 1A-B, [14,32]). This stimulus contained complex natural temporal statistics but simple spectral properties. Thus it allowed an experimental focus on nonlinear temporal processing in the presence of multiple spectral features. Noise bands were one-quarter octave and modulated by different natural vocalization envelopes. Both bands were positioned so that they fell in the spectral receptive field of recorded neurons, as measured by briefly presented tones or noise bursts (Fig 1B).

[FIGURE 1]

The dynamic vocalization-modulated noise often evoked reliable time-varying responses from A1 neurons, but the timecourse of this response varied substantially. Peri-stimulus time histogram (PSTH) responses computed from average repetitions of identical noise stimuli showed that responses could predominantly follow the envelope of one or both of stimulus bands (Fig. 1C). Thus, while all neurons included in the study were excited by isolated, narrowband stimuli in each frequency bands, responses to stimuli presented in both bands simultaneously were complex and varied across neurons.

We used the linear-nonlinear spectro-temporal receptive field (LN STRF) to establish a baseline characterization of auditory encoding properties (Fig. 2A, [33–35]). This model describes time-varying neural activity as the linear weighted sum of the immediately preceding stimulus spectrogram (Eq. 1). The LN STRF assumes no nonlinear interactions between spectral channels or across time lags. The model used here was a simplified version of the spectro-temporal model typically estimated using broadband modulated

noise or natural stimuli. Because the vocalization-modulated noise consisted of just two distinct spectral channels, the STRF in turn required a linear filter with only two spectral channels. To account for well-established nonlinear threshold and saturation properties of spiking neurons, the linear filtering stage was followed by a static, sigmoidal output nonlinearity (Eq. 2).

[FIGURE 2]

The LN STRF, as well as the other models discussed below, was fit using gradient descent [36,37]. Model performance was assessed by the accuracy with which it predicted the time-varying response to a novel validation stimulus that was not used for estimation [22]. Prediction accuracy was quantified by the correlation coefficient (Pearson's  $R$ ) measured between the predicted and actual PSTH response, corrected to account for sampling limitations in the actual response [38]. A value of  $R=1$  indicated a perfect prediction and  $R=0$  indicated random prediction.

The LN STRF was able to capture some response dynamics of A1 neurons, but several errors in prediction can be seen in the example data. In particular, the LN STRF failed to account for transient responses following stimulus onset (Fig. 1C). For stimuli consisting of a single modulated noise band, a model that incorporates the dynamics of nonlinear short-term synaptic plasticity (STP) prior to the linear filtering stage provides a more accurate prediction of neural activity [14]. Given that STP occurs at synaptic inputs, this observation suggests that A1 neurons can undergo adaptation independently for inputs in different spectral channels. This spectrally tuned adaptation could give rise to a rich code for complex spectro-temporal patterns [21]. However, it is not clear from previous work whether the nonlinear adaptation occurs primarily after information is summed across spectral channels or if it occurs separately for the different spectral channels.

Building on the classic LN STRF, we tested how incorporating nonlinear adaptation into the STRF could improve its explanatory power. Adaptation was modeled as short-term synaptic plasticity (STP,

depression and/or facilitation), a widespread neurophysiological phenomenon, which can explain transient responses to sound onsets [14,18]. To determine whether adaptation occurs pre- or post-spectral integration, we estimated two variants of the STRF, a *global STP STRF*, in which both input channels undergo the same adaptation prior to linear filtering (Fig. 2B), and a *local STP STRF*, in which each channel adapts independently to the noise stream in a spectral band (Fig. 2C).

In addition, we considered the possibility that spectral channels might be grouped into overlapping subsets prior to adaptation. In sensory cortex, signals arriving at different synapses arrive from different peripheral channels, but these inputs are often overlapping [39]. To account for separate but possibly overlapping spectral inputs, we developed a reweighted STP STRF, in which input channels were linearly combined before undergoing linear filtering and STP (Fig. 2D). The example illustration shows a model in which the two inputs were reweighted into two channels (Fig. 2D), but we also considered models with three and four channels (see Fig. 3 and Methods). As in the case of the linear STRF, the STP models included the same static output sigmoidal nonlinearities. While the linear filter and static nonlinearity architectures were fixed across models and all models were fit using identical data sets, the free parameters were all fit separately for each model.

### [FIGURE 3]

These different encoding models can each be cast as a sequence of transformations, where the output of one transformation is the input to the next. Their modularity enables visualization of how the data is transformed at each step of the encoding process. Figure 3 illustrates the transformations that take place in an example reweighted STP STRF. The vocalization-modulated noise envelope is first linearly reweighted into three channels. In this example, the first reweighted channel follows closely the stream in the first input channel. Second, the three reweighted channels undergo independent STP-like adaptation. The first reweighted channel experiences the strongest adaptation. The adapted channels are then convolved with a linear filter, which in this case is excitatory for channel 1, inhibitory for channel 2, and transient



excitation for channel 3. The convolved channels are summed and then pass through a static nonlinearity to generate the final predicted time-varying spike rate. The PSTH response predicted by the reweighted STP STRF can be compared directly to the actual PSTH and predictions by other models (Fig. 4).

[FIGURE 4]

For 187 out of the 200 A1 neurons studied, both spectral channels of the LN STRF had non-zero gain and at least one STRF was able to predict time-varying responses with greater than chance accuracy ( $p < 0.05$ , Bonferroni-corrected permutation test). Prediction correlation for the global STP model was significantly greater than the linear model for a subset of neurons ( $n = 21/187$ ,  $p < 0.05$ , permutation test, Fig. 4B). We assessed average performance across the population using median prediction correlation, as performance was close to the upper bound of  $r = 1.0$  for many neurons. The median noise-corrected prediction correlation across the entire sample of neurons was greater for the global STP model (median 0.686 vs. 0.712,  $p = 1.2 \times 10^{-7}$ , sign test). In addition, the local STP STRF often showed improved prediction accuracy over the global STP STRF. Across the population 11/187 neurons showed significantly greater prediction correlation for the local STP model, and the mean prediction correlation was also greater (median 0.712 vs. 0.728,  $p = 0.011$ , sign test). These results indicate that nonlinear adaptation described by the STP model occurs within distinct spectral channels rather than uniformly across spectral channels.

Finally, we assessed the effect of allowing the incoming spectral channels to be linearly recombined prior to nonlinear STP (Fig. 2D). Because the reweighted spectral channels underwent a subsequent nonlinear transformation, mapping to a larger number of channels than the original number of inputs could improve performance (whereas increasing channel count for a purely linear STRF could not). Thus, we considered multiple reweighted STRFs, where the two spectral channels were mapped by linear reweighting to either two (2x), three (3x) or four channels (4x). When compared to the local STP STRF, the reweighted STP STRF often showed improved prediction accuracy (Fig. 4A). Across the population, the median prediction correlation for the 2x reweighted STP STRF was greater than the local STP STRF (median 0.771,

$p=2.4 \times 10^{-11}$ , sign test, Fig. 4B). The 3x reweighted STP STRF showed further improvement over the 2x reweighted model (median 0.784,  $p=0.0096$ , sign test). The 3x reweighted model showed the best overall performance, with prediction correlation significantly greater than the linear model for 55/187 neurons ( $p<0.05$ , permutation test). Increasing the channel count further did not provide a further improvement (4 x STP STRF, median 0.781,  $p>0.2$ ). Thus, a model with distinct but overlapping spectral channels that undergo independent nonlinear adaptation improves model performance further. The trend toward decreased performance by the 4x model likely reflects over-fitting and the finite size of the available datasets. Performance of higher channel-count models should improve on at least the 3 x STP STRF with a larger dataset for each neuron. We focused our subsequent analysis of tuning on the 3x reweighting STP STRF, but nearly identical effects were observed for the 2x reweighting STP STRF.

### **Spectrally tuned adaptation is stronger for excitatory than inhibitory inputs**

We studied properties of the LN and STP STRFs in order to understand what features of the STP STRFs lead to their improved performance. Response dynamics varied across A1 neurons, sometimes emphasizing only sound onsets and in other cases tracking one or both envelopes across the entire trial. For many neurons, both models were able to capture the coarse response dynamics, but the STP model was able to predict the transient responses and the relative amplitude of responses more accurately (Fig. 5 B-C). In some cases the LN and STP STRFs performed equivalently, indicating that neurons varied in the degree of nonlinear adaptation (Fig. 5G).

[FIGURE 5]

Although isolated stimuli in both stimulus channels usually evoked excitatory responses (Fig. 1C), the gain of one filter in the LN STRF was often negative (Fig. 5, middle column). These suppressive responses likely reflect the unmasking of inhibition by broadband stimuli [40]. We quantified the gain of

each STRF channel by summing the linear filter coefficients across time lags (Fig. 6A). By definition, one channel always had the largest gain, which we identified as the strongest input channel. A comparison of gain for strongest versus weakest gain showed that one channel was always positive ( $n=187/187$  units), but the weaker channel could often be negative ( $n=76/187$ , Fig. 6B).

Strikingly, inhibition was even more prevalent in reweighted STP STRFs, where almost every filter contained at least one channel with negative gain (Figs. 5, right column). As in the case of LN STRFs, the strongest input channel was always positive ( $n=187/187$ ). The fit procedure was in no way constrained to force a negative channel, but the lowest-gain channel was almost always negative ( $n=175/187$ , Fig. 6C). There was no difference in the prevalence of inhibitory channels in neurons that showed a significant improvement for the STP model, compared to neurons that did not show an improvement.

# [FIGURE 6]

We wondered whether adaptation captured by the STP model differed between excitatory and inhibitory channels. For each of the 187 neurons included in the STRF analysis, we compared the STP parameters (akin to release probability, recovery time constant) and the overall adaptation index between highest- and lowest gain channels. The adaptation index measured one minus the ratio of the output to input of the synapse for a standard test input (Fig. 6A, David and Shamma, 2013). Index values greater than zero indicated depression, and values less than zero indicated facilitation. When we compared adaptation properties between channels, we observed that release probability and adaptation index were both stronger, on average, for excitatory versus inhibitory channels ( $p<10^{-6}$ , sign test, Fig. 6C, E). The mean adaptation index of excitatory channels (0.28) was more than twice that of inhibitory channels (0.13). These results suggest that predominantly excitatory responses in A1 are decreased following sustained input, while inhibition undergoes little or no adaptation. Mean adaptation recovery time constant did not differ between excitatory and inhibitory channels, although the value of the time constant has little impact on model behavior when adaptation is weak (Fig. 6D).

# **Spectrally tuned adaptation supports contextual effects of stimulus-specific adaptation**

Nonlinear adaptation has previously been proposed to play a role in contextual effects on auditory cortical responses [6]. One common measure of contextual influences on auditory activity is stimulus specific adaptation (SSA, [9,10]). When two discrete stimuli are presented in a regular sequence, with a standard stimulus presented more frequently than an oddball stimulus, responses to the standard tend to undergo adaptation, but responses to the oddball stimulus can be less adapted or even facilitated relative to a silent context. Effects of SSA have been attributed to feedforward adaptation and/or lateral inhibition [19,20].

To test for SSA effects in a subset of neurons, we presented standard/oddball sequences of noise bursts, falling in the same spectral bands as the vocalization-modulated noise stimuli. We measured SSA for these responses by an SSI index (SI) that compared responses to noise bursts when they appeared as standards vs. oddballs [9]. Adaptation effects were weaker than previously been reported for A1 in anesthetized animals, but SI was significantly greater than zero in 43% of neurons ( $p < 0.05$ , standard/oddball shuffle test,  $n = 44/102$ ). We tested whether models including STP could predict responses to oddball stimuli and explain SSA effects. LN, global STP, local STP and 2 x reweighted STP STRFs were fitted to the SSA data. Because the design of the oddball stimulus experiments did not include repetitions of the same sequences, models were fit and tested using single trials. This design precluded correcting the prediction correlation for variability in the neural response [23,38], leading to comparatively lower correlation values than for the other stimulus sets. Nonetheless, the introduction of nonlinear model elements was accompanied by improved prediction accuracy: between the worst- and best performing models (LN STRF vs. 2x reweighted STP STRF, respectively), 46% of the cells responses were significantly better predicted by the best model ( $p < 0.05$ , jackknifed *t*-test,  $n = 47/102$ ) (Fig. 7A). Considering the performance of all models, there was a significant increase in prediction accuracy with an increase in model complexity (LN vs global STP STRF,  $p = 1.7 \times 10^{-4}$ . Global STP STRF vs local STP STRF,  $p = 1.9 \times 10^{-12}$ . Local STP STRF vs 2x reweighted STP STRF,  $p = 2.2 \times 10^{-3}$ , sign test, Fig. 7C). This pattern of improvement closely parallels model performance for the vocalization-modulated noise data (Fig. 5).

## [FIGURE 7]

As in the case of the vocalization-modulated noise stimuli, we observed varying degrees of STP across neurons. Because the models could predict time-varying responses to the noise stimuli, we could measure SI from responses predicted by the models. For neurons with significant SI ( $p < 0.05$ , standard/oddball shuffle test,  $n=44/102$ ) we measured the correlation between actual and predicted SI values. The best performing model, the 2x reweighted STP STRF, was able to significantly predict the SI of each neuron ( $r=0.636$ ,  $p=3.4 \times 10^{-6}$ , Wald Test with t-distribution of the slope, Fig. 7B, blue). On the other hand, the LN STRF was unable to predict SI ( $r=0.011$ ,  $p=0.95$ , Wald Test with t-distribution of the slope, Fig. 7B, orange). When comparing the SI prediction error across model architectures, the mean population error consistently decreased with increasing model complexity (LN vs global STP STRF,  $p=0.024$ ; global STP STRF vs local STP STRF,  $p=0.017$ , sign test. Fig. 7D), although the increase for the local STP STRF vs. 2x reweighted STP STRF was not significant ( $p=0.91$ ). Among the fit STP parameters, the recovery time constant for each neuron  $\tau_i$ , averaged across spectral bands, was correlated with SI ( $r=0.300$ ,  $p=0.003$ , Wald Test with t-distribution of the slope. Data not shown). The change in the synaptic resource availability (release probability) parameter was not correlated with SI. Thus, A1 neurons that showed evidence for nonlinear STP-like adaptation also exhibited SSA, indicating that the two phenomena may share common mechanisms.

### **Nonlinear adaptation is robust to changes in behavioral state**

Several previous studies have shown that the response properties of neurons in A1 can be affected by changes in behavioral state. When animals engage in a task that require discrimination between sound categories, neurons can shift their gain and selectivity to enhance discriminability between the task-relevant

categories [24,25,28]. Changes in overall gain are observed most commonly, and effects on more precise aspects of sensory selectivity have been more variable and difficult to characterize.

We tested if changes in behavioral state can influence the nonlinear STP-like adaptation we observed in A1. We trained ferrets to perform a tone detection task, in which they reported the occurrence of a pure tone target embedded in a vocalization-modulated noise sequence (Fig. 8A). We recorded neural activity during passive listening to the task stimuli and during active performance of the tone detection task. We then estimated STP STRFs in which the model parameters were either fixed between behavior conditions or allowed to vary between conditions. Because identical stimuli were used in both conditions, any differences in the STRF could be attributed to changes in behavioral state.

[FIGURE 8]

When the parameters of the static nonlinearity were allowed to vary between passive and active states, the models showed a significant improvement in predictive power over the behavior-independent STRF for data in both behavior conditions (Fig. 8B-D). However, allowing other model parameters to vary with behavioral state provided no additional improvement in model performance (Fig. 8D). Thus, the changes in behavioral state appear to primarily influence the overall gain of the neural response without affecting the dynamics of the linear filter or nonlinear adaptation captured by the STP STRF.

We also considered whether STP effects predicted the likelihood of behavior-dependent changes in activity. When we compared the incremental improvement in prediction accuracy resulting from addition of nonlinear STP or behavior-dependent gain to the STRF model, effects were highly variable (Fig. 8C). Some neurons showed improvement only for STP or behavior-dependence, and just a small number show improvements for both. Overall, these effects occurred independently across the population ( $p > 0.1$ , permutation test).

The comparison of prediction accuracy between behavior-dependent models suggests that the response gain can change between passive and active conditions but STP parameters do not. When we compared parameters between STRFs fit separately under the different behavioral conditions, we found this to be the case. The average gain of the auditory response was the same in the active versus passive state when the target tone in the neuron's RF (mean maximum response 78 vs. 79 spk/sec,  $p>0.3$ , sign test, Fig. 8E) but enhanced when the target frequency was outside the RF (mean maximum response 65 vs. 80 spk/sec,  $p=0.012$ , sign test, Fig. 8E). Average STP strength, on the other hand, was unchanged for both target conditions (in RF: mean STP index 0.11 vs. 0.12,  $p>0.3$ ; outside RF: 0.093 vs. 0.10,  $p>0.3$ , sign test, Fig. 8E-F, right panels). The relative suppression of response gain for targets in RF versus outside RF replicates previous findings for selective attention [26]. Although behavior-dependent STP did not improve prediction accuracy, there was variability in the measured STP strength across behavioral conditions for some neurons. This variability likely reflects the challenges of estimating nonlinear model parameters with limited data during behavioral experiments. A larger dataset may uncover significant behavior-dependent changes in nonlinear adaptation. However, the current analysis shows no improvement in model prediction accuracy (Fig. 8D) nor any systematic changes in STP strength between behavior conditions.

# **Natural stimuli reveal nonlinear adaptation of spectrally overlapping channels in A1**

The vocalization-modulated noise data reveal that spectrally distinct inputs can undergo independent adaptation in A1, supporting contextual coding phenomena such as SSA. In order to understand these nonlinear adaptation effects in a more ethological context, we also recorded the activity of 284 A1 neurons from 5 awake, passive ferrets during presentation of fully natural sounds. The natural stimuli were drawn from a large library of natural sound (textures, ferret vocalizations, human speech and recordings of the ambient laboratory environment), chosen to sample a diverse range of spectro-temporal modulation space.

[FIGURE 9]

Neural encoding properties were modeled by a reduced-rank STRF model (Fig. 9A, Thorson et al., 2015). For the LN STRF, the sound spectrogram passed through a bank of three spectral filters, each of which computed a linear weighted sum of the spectrogram at each time bin. The spectral filter output then passed through a linear temporal filter and static nonlinearity, identical in architecture to the vocalization-modulated noise models. To test for nonlinear adaptation, local STP was introduced to the model. In this case, the output of the spectral filters passed through an STP filter prior to the linear filtering stage (Fig. 9A).

The STP STRF predicted time-varying natural sound responses more accurately, on average, than the LN STRF (Fig. 9B). The STP model performed significantly better for 62/284 of the A1 neurons studied, and the average prediction accuracy was significantly higher for the STP model (median 0.525 vs. 0.573,  $p=6.3 \times 10^{-20}$ , sign test). Thus, introducing local nonlinear adaptation to a spectro-temporal model for encoding of natural sounds provides a similar benefit as for encoding of vocalization-modulated noise.

We also compared STP effects between excitatory and inhibitory channels. As in the case of the vocalization-modulated noise data, each linear filter channel was classified as excitatory or inhibitory based on the sign, positive or negative, of its average gain (Fig. 9C). A comparison between these groups revealed the mean STP index was significantly larger for excitatory channels (mean 0.21) than for inhibitory channels (mean 0.11,  $p=0.012$ , sign test, Fig. 9D). As in the case of vocalization-modulated noise (Fig. 6), the weaker STP for inhibitory channels suggests that these inputs undergo little or no adaptation, while excitatory inputs tend to undergo stronger adaptation. These effects did not depend on spectral tuning of the filters, as the differences in STP for excitatory versus inhibitory channels were consistent across filter center frequencies. There was also substantial heterogeneity in the strength of STP and the degree of overlap of between spectral filters in an STRF (Fig 9E). Thus, while many A1 neurons showed evidence for STP-like adaptation, especially in excitatory channels, the degree of adaptation varied widely between neurons.



# Discussion

We found that the adaptation of neurons in primary auditory cortex (A1) to natural and naturalistic sounds is spectrally selective. These adaptation effects can be modeled by a neuron with multiple input synapses that independently undergo short-term plasticity (STP). Spectro-temporal receptive field (STRF) models that incorporate nonlinear, spectrally tuned adaptation predict neural responses more accurately than the classic linear-nonlinear (LN) STRF for both naturalistic vocalization-modulated noise and for fully natural stimuli. They also predict responses more accurately than models that undergo a global (non-spectrally tuned) adaptation. These adaptation effects are stable across changes in behavioral state, even as neurons undergo task-related changes in the gain of sound-evoked responses [24,26]. While the observed adaptation could be produced by a mechanism other than STP, these results demonstrate a general principle, that spectrally tuned adaptation plays an important role in encoding of complex sound features in auditory cortex.

Spectrally tuned adaptation may support perception of complex sound features, such as phonemes in speech and vocalizations [1], and may be of particular importance for hearing in noisy environments [41–43]. Evoked activity in A1 rarely has latency longer than 50 ms, but adaptation lasting several tens to hundreds of milliseconds can impact these short latency responses. Neurons that undergo adaptation will change their effective spectro-temporal tuning. By comparing responses of adapting and non-adapting neurons, a decoder could infer information about stimuli at longer latencies. Thus adaptation state can operate as an encoding buffer, integrating stimulus information over a longer time window than the latency of the evoked response.

A smoothly adapting contextual code produced by mechanisms such as STP may extend broadly across the brain [21,44]. Theoretical studies of the visual cortex have argued that variation in synaptic depression across neurons can explain differences temporal frequency tuning [31]. Synaptic depression has also been implicated in producing gain control in hippocampus [44]. Thus an auditory code that uses

spectrally tuned adaptation provides an example of a computational process that may occur generally across neural systems.

## Neural coding of auditory context

Studies of contextual effects have shown that the spectro-temporal selectivity of auditory neurons can change with broad statistical properties of sound stimuli, including temporal regularity [9,10], contrast [11,15], and intensity [13,45,46]. These contextual effects are typically measured in the steady state. Neural activity is characterized during discrete epochs in which the statistical properties defining context are held constant. The current results suggest that the same mechanisms that affect activity in the steady state also operate dynamically during the encoding of complex natural stimuli. Spectrally tuned adaptation supports a rich spectro-temporal code in which a continuously changing sensory context, reflecting the previous 100-1000 ms, modulates short-latency (0-100 ms) responses to continuous natural sounds [47].

The timecourse of STP-like adaptation occurs over tens to hundreds of ms, consistent with the timecourse of adaptation in encoding models that incorporate contrast gain control [15]. These effects may also share dynamics with models in which local sensory context of synthetic tone stimuli modulates sound-evoked activity [17]. Previous studies of gain control and contextual modulation have suggested, variously, that either feed-forward adaptation (in cortex or midbrain) or lateral cortical circuits could shape the encoding of spectro-temporal sound features [15–17,48]. In all cases, relatively slow changes in stimulus contrast or power around the neurons receptive field can influence sensory selectivity. Thus mechanisms other than STP may be able to support adaptation with similar dynamics. Further study is required to determine if these different models are functionally equivalent or how feedforward and feedback elements of the auditory network contribute to this dynamic coding.

While the STP model used in this study supported both depression and facilitation, the vast majority of measured adaptation effects were consistent with depression. The strength of depression was generally much stronger for excitatory spectral inputs, while it was weaker or absent for inhibitory inputs. The predominance of adaptation in excitatory channels is consistent with a coding system in which responses to the onset of sound are broadly tuned, but as excitation adapts, the sustained inhibition sculpts responses so that sustained activity is tuned to a narrower set of sound features [49].

The relative tuning, strength and adaptation properties of excitatory versus inhibitory inputs are not stereotyped but instead vary substantially across A1 neurons. In most neurons, the STP STRF revealed at least partially overlapping excitatory and inhibitory inputs, consistent with previous work [50,51]. However, across individual neurons, the best frequency and bandwidth of excitatory channels can be greater or smaller than those of the inhibitory channels. Thus, instead of reflecting a consistent pattern of selectivity, neurons display a diversity of tuning properties that supports a rich code of distinct spectro-temporal patterns. This diversity of synaptic properties can explain the differences in selectivity across A1, including spectro-temporal tuning [52], monotonic versus non-monotonic level tuning [53,54] and temporal versus rate coding of temporal modulations [55,56].

The present study was performed on serial recordings of isolated single units, ignoring possible interactions between neurons that could influence sound coding [57]. Simultaneous recordings of neural populations will illuminate the role of adaptation on network connectivity and population dynamics that likely contribute to context-dependent encoding [58,59].

## **Robustness of adaptation effects across changes in behavioral state**

Studies in behaving animals have shown that gain and selectivity of A1 neurons can be influenced by changes in behavioral state, such as arousal, task engagement, and selective attention [25–28]. We observed

changes in response gain during task engagement, consistent with this previous work, and incorporating behavior state-dependent gain into the STRF model improved prediction accuracy. However, average adaptation properties did not change across behavioral conditions. Moreover, allowing nonlinear adaptation to vary between behavior conditions did not improve model performance. Thus, STP-like adaptation properties appear to be largely stable across short-term changes in behavioral state. It remains to be seen if they change over longer time scales, but the relative stability of tuning suggests that nonlinear adaptation contributes to a veridical code of sound features in A1 that is selectively gated into high-order, behavior-dependent features in downstream auditory fields.

The approach of incorporating behavioral state variables into sensory encoding models may be useful for integrating bottom-up and top-down coding more broadly [60]. As sound features take on different behavioral meanings, such as when selective attention is engaged, coding in the auditory system must also shift to represent the behaviorally relevant sound features [61,62]. A complete understanding of state-dependent changes in sounds encoding thus requires models of how neurons change their coding properties in different behavioral states.

## **Stimulus specific adaptation**

Stimulus specific adaptation is one of the best-studied contextual effects in auditory cortex [9,10]. The STP STRF developed in the current study is able to account for SSA during steady state sound presentation. At the same time, the STP model reveals that the same adaptation mechanisms support a broader dynamic code, in which the degree of adaptation is continuously updated to reflect the history of the changing stimulus. This adaptation represents a generalization of SSA, as it does not depend strictly on the regularity the sensory input [63]. In this way, STP parameters provide a complementary metric to SSA, able to explain nonlinear adaptation for a broader set of stimuli and readily scalable to analysis at a population level.

While nonlinear adaptation and SSA effects are correlated, the strength of this relationship varies across individual neurons. This variability supports the possibility that mechanisms other than STP contribute to SSA. The idea that synaptic depression alone can support SSA has been also disputed because oddball stimuli can sometimes evoked responses that are enhanced relative to those stimuli presented in isolation [20]. However, for a neuron with inhibitory inputs that undergo adaptation, a disinhibition mechanism could produce enhanced oddball responses. The data in the current study suggest that inhibitory inputs generally show weaker adaptation than their excitatory partners, which is consistent with other modeling studies [49]. However, even inhibitory inputs do tend to undergo some depression, leaving open the possibility that they could explain the enhanced oddball responses during SSA. Inhibitory interneurons in auditory cortex have been shown to contribute to SSA [19], but their role in natural sound coding has yet to be characterized.

# **Methods**

All procedures were approved by the Oregon Health and Science University Institutional Animal Care and Use Committee and conform to standards of the Association for Assessment and Accreditation of Laboratory Animal Care (AAALAC).

## *Animal preparation*

Eleven young adult male and female ferrets were obtained from an animal supplier (Marshall Farms, New York). A sterile surgery was performed under isoflurane anesthesia to mount a post for subsequent head fixation and to expose a small portion of the skull for access to auditory cortex. The head post was surrounded by dental acrylic or Charisma composite, which bonded to the skull and to a set of stainless steel screws embedded in the skull. Following surgery, animals were treated with prophylactic antibiotics and analgesics under the supervision of University veterinary staff. The wound was cleaned and bandaged during a recovery period. After recovery (approximately 2 weeks), animals were acclimated to a head-fixed posture over a period of about one week.

## *Acoustic stimulation*

Five awake, passively listening animals were presented with vocalization-modulated noise [14,26,32] (Fig. 1). The stimuli consisted of two streams of narrowband noise (0.25-0.5 octave, 65 dB peak SPL, 3 s duration). Each stream was centered at a different frequency and modulated by a different envelope taken from one of 30 human speech recordings [64] or ferret vocalizations from a library of kit distress calls and adult play and aggression calls [14]. Each envelope fluctuated between 0 and 65 dB SPL, and its temporal modulation power spectrum was low-pass with 30 dB attenuation at 10 Hz, typical of mammalian

vocalizations [65]. Thus, the spectral properties of the noise streams were simple and sparse, while the temporal properties matched those of ethological natural sounds.

For three animals, vocalization-modulated noise was presented during passive listening and during active performance of a tone detection task (see below). During passive stimulation experiments, both noise streams were positioned in non-overlapping frequency bands in a neuron's receptive field (0.25-1 octave center frequency separation) and were presented from a single spatial location. During behavioral experiments, the streams were centered at different frequencies (0.9-4.3 octave separation) and presented from different spatial locations ( $\pm 30$  degrees azimuth), such that one stream fell outside of the spectral tuning curve.

In a subset of experiments with two animals, an oddball stimulus was presented to passively listening animals to characterize stimulus-specific adaptation [9]. Stimuli consisted of a sequence of regularly repeating noise bursts (100 ms duration, 30 Hz), with the same center frequency and bandwidth as the vocalization-modulated noise presented during the experiment. On each 20-second trial, 90% of the noise bursts fell in one band (standard) and a random 10% were in the other band (oddball). The spectral bands of the standard and oddball streams were reversed randomly between trials.

Finally, in a different set of experiments, six passively listening animals were presented a library of 93, 3-sec natural sounds. The natural sounds included human speech, ferret and other species' vocalizations, natural environmental sounds, and sounds from the animals' laboratory environment.

In all experiments, the majority of stimuli (28 vocalization-modulated noise samples or 90 natural sounds) were presented a small number of times (2-5 repetitions). The remaining sounds were presented 10-30 times, allowing for robust measurement of a peri-stimulus time histogram (PSTH) response (Fig. 2).

Experiments took place in a sound-attenuating chamber (Gretch-Ken) with a custom double-wall

insert. Stimulus presentation and behavior were controlled by custom software (Matlab). Digital acoustic signals were transformed to analog (National Instruments), amplified (Crown), and delivered through free-field speakers (Manger, 50-35,000 Hz flat gain) positioned  $\pm 30$  degrees azimuth and 80 cm distant from the animal. Sound level was calibrated against a standard reference (Brüel & Kjær).

### *Neurophysiological recording*

After animals were prepared for experiments, we opened a small craniotomy over primary auditory cortex (A1). Extracellular neurophysiological activity was recorded using 1-4 independently positioned tungsten microelectrodes (FHC). Amplified (AM Systems) and digitized (National Instruments) signals were stored using MANTA open-source data acquisition software [66]. Recording sites were confirmed as being in A1 based on tonotopy and relatively reliable and simple response properties [67,68]. Single units were sorted offline by bandpass filtering the raw trace (300-6000 Hz) and then applying PCA-based clustering algorithm to spike-threshold events [35].

Upon unit isolation, a series of brief (100-ms duration, 100-ms interstimulus interval, 65 dB SPL) quarter-octave noise bursts was used to determine the range of frequencies that evoked a response and the best frequency (BF) that drove the strongest response. If a neuron did not respond to the noise bursts, the electrode was moved to a new recording depth. The frequencies of the vocalization-modulated noise stimuli were then selected based on this tuning curve, so that one or both of the noise bands fell in the frequency tuning curve measured with single noise bursts.

### *Tone detection task*

Three ferrets were trained to perform a tone in noise detection task [26]. The task used a go/no-go



paradigm, in which animals were required to refrain from licking a water spout during presentation of vocalization-modulated noise until they heard the target tone (0.5 s duration, 0.1 s ramp) centered in one noise band at a random time (1, 1.5, 2, ... or 5 s) after noise onset. To prevent timing strategies, the target time was distributed randomly with a flat hazard function [69]. Target times varied across presentations of the same noise distractors so that animals could not use features in the noise to predict target onset.

In a block of behavioral trials, the target tone matched the center frequency and spatial position of one noise stream. Because only one stream fell in a neuron's receptive field, blocks could be labeled "inside RF" (target tone in the stream falling at a frequency in the neuron's receptive field) or "outside RF" (target in the stream outside the receptive field). Data was collected from some neurons for both inside and outside RF blocks, but the current study only compares neural responses from a single behavioral block and a passive block during which identical stimuli were presented. A comparison of gain changes between inside and outside conditions, as well as for conditions of varying difficulty, is reported elsewhere [26].

Behavioral performance was quantified by hit rate (correct responses to targets vs. misses), false alarm rate (incorrect responses prior to the target), and a discrimination index (DI) that measured the area under the receiver operating characteristic (ROC) curve for hits and false alarms [26,70]. A DI of 1.0 reflected perfect discriminability and 0.5 reflected chance performance.

A detailed analysis of behavior is reported elsewhere [26]. In the current study, only data from blocks with DI significantly greater than chance and correct trials were included in the analysis of neural encoding.

### *Spectro-temporal receptive field models*

*Linear-nonlinear spectro-temporal receptive field (LN STRF).* Vocalization-modulated noise was designed so that the random fluctuations in the two spectral channels could be used to measure spectro-temporal encoding properties. The *LN STRF* is a widely viewed as a current standard model for early stages

of auditory processing [34,71–73]. The LN STRF is an implementation of the generalized linear model (GLM), which is used widely across the auditory and other sensory systems [74,75]. In the first, linear stage of this model, a finite impulse response (FIR) filter,  $h(x,u)$ , is applied to the stimulus spectrogram,  $s(x,t)$ , to produce a linear prediction of time-varying spike rate,  $r_L(t)$ ,

$$r_L(t) = \sum_{x=1}^2 \sum_{u=0}^U h(x,u)s(x,t-u) \quad (1)$$

For the current study, the time lag of temporal integration,  $u$ , ranged from 0 to 150 ms. In typical STRF analysis, the stimulus is broadband and variable across multiple spectral channels,  $x$ . Here, the stimulus spectrogram was composed of just two time-varying channels, and a simplified version of the STRF was constructed in which  $x$  spanned just these two channels (*i.e.*,  $x=1$  or  $2$ ). A log compression was applied to the spectrogram to account for cochlear nonlinearities [23]. Otherwise, this model functions as a traditional STRF.

In the second stage of the LN model, the output of the linear filter,  $r_L(t)$  is transformed by a static, sigmoidal nonlinearity, which accounts for spike threshold and saturation. The current study used a double exponential,

$$r(t) = b + A \exp[-\exp(\kappa(r_L(t) - m))] \quad (2)$$

where  $b$  is the baseline (spontaneous) spike rate,  $A$  is the maximum evoked rate,  $\kappa$  is the slope, and  $m$  is the offset of the sigmoid. In a previous study, we compared performance of a variety of different static nonlinearities for LN STRFs and found that this formulation performed slightly, but consistently, better than other formulations [23]. However, the performance differences between nonlinearities are small, and the specific choice of nonlinearity is unlikely to substantially affect the outcome of analyses that manipulate other elements of the model architecture, such as those that follow.

*Short-term plasticity (STP) STRF.* As several studies have demonstrated, the LN STRF captures import aspects of spectro-temporal coding but fails to account completely for time-varying sound evoked

activity in auditory cortex [15,17,72,76]. In particular, the LN STRF fails to account for the temporal dynamics of sound-evoked activity [14,35]. Short-term synaptic plasticity (STP), the depression or facilitation of synaptic efficacy following repeated activation, has been proposed as one mechanism for nonlinear dynamics in neural networks [8,18]. A previous study showed that an LN model for A1 that incorporated STP was able to better explain the dynamics of responses to a single noise band with natural temporal modulations [14]. However, because that study utilized vocalization-modulated noise comprised of only a single noise band, it was not clear whether the nonlinear adaptation was *global*, affecting responses to all stimuli equally, or *local*, affecting only a subset of inputs independently. Because the current study used multiple noise channels, it could compare a global STP STRF, in which adaptation affected all input channels, to a local STP STRF, in which adaptation was spectrally tuned and could affect just a subset of inputs.

In both models, the effects of nonlinear adaptation were captured with a simple, two-parameter model of STP [18],

$$d(i, t) = d(i, t - 1) + s(i, t - 1)[1 - d(i, t - 1)]v_i - \frac{d(i, t - 1)}{\tau_i} \quad (3)$$

where  $d(i, t)$  describes the change in gain for stimulus channel  $i$  at time  $t$ . The change in available synaptic resources (release probability),  $v_i$ , captures the strength of plasticity, and the recovery time constant,  $\tau_i$ , determines how quickly the plasticity returns to baseline. Values of  $d < 1$  correspond to depression (driven by  $v_i > 0$ ) and  $d > 1$  correspond to facilitation ( $v_i < 0$ ). In the *local STP STRF*, each input channel of the stimulus is scaled by  $d(i, t)$  computed for that channel,

$$s_{STP}(i, t) = d(i, t)s(i, t) \quad (4)$$

This nonlinearly scaled stimulus is then provided as input to the LN filter (Eqs. 1-2) to predict the time-varying response.

To model global adaptation, the *global STP STRF* applied STP to the output of the linear filter (Eq. 1) before applying the static nonlinearity (Eq. 2). Thus, a single adaptation term was applied to all incoming

stimuli, rather than allowing for the channel-specific adaptation in the local STP STRF. There is no simple biophysical interpretation of the global STP mechanism, but it can be thought of as a postsynaptic effect, capturing nonlinear dynamics similar to STP, but after integration across spectral channels. We compared performance of this model to a variant in which stimulus gain is averaged across spectral channels before scaling the input stimulus,

$$\bar{d}(t) = \langle d(i, t) \rangle_i \quad (5)$$

We found no difference between this common input STP model and the global STP STRF. Because the global model required fewer free parameters, we focused on this model for the comparisons in this study.

*Reweighted STP STRF.* One important aspect of how auditory neurons encode stimuli is that they might integrate multiple inputs from the same spectral channel, but with different adaptation properties. Such a model has been used to explain differential adaptation of onset and offset responses in A1 [39]. From a theoretical perspective, this architecture supports a rich encoding of spectro-temporal features [21]. To map spectral inputs into multiple adapting channels, a reweighted stimulus,  $s_R(j, t)$ , was computed as the input stimulus scaled by coefficients,  $w(i, j)$ ,

$$s_R(j, t) = \sum_{i=1}^2 w(i, j) s(i, t) \quad (6)$$

where  $j=1 \dots J$  maps the stimulus to a  $J$ -dimensional space. This reweighted stimulus provides input to a local STP STRF. In a linear model, reweighting would not permit any additional functional properties. However, in the STP STRF each stimulus channel undergoes separate nonlinear adaptation. Thus, reweighting the stimuli before STP allows the model to encompass a wider functional domain. Although the input is comprised of just two channels, the subsequent nonlinear filtering means that allowing the reweighted stimulus channel count,  $J$ , to be greater than two can further increase model predictive power. In the current study, we evaluated models with  $J=2, 3$  or  $4$ . Predictive power was not enhanced for  $J > 3$ , but this lack of an effect may reflect the limited size of the data set available for fitting.

The set of encoding models described above represents a hierarchy of model architectures with increasing complexity, in that each successive model requires additional free parameters. Each model can be cast as a sequence of transformations applied to the stimulus, and the output of the final transformation is the predicted time-varying response (Fig. 3).

The entire parameter set was fit separately for each model architecture. We used identical estimation data from each neuron and the same gradient descent algorithm for each model [36]. Spike rate data and stimulus spectrograms were binned at 10 ms before analysis. The ability of the encoding model to describe a neuron's function was assessed by measuring the accuracy with which it predicted time varying activity in a held-out validation dataset that was not used for model estimation. The *prediction correlation* was computed as the correlation coefficient (Pearson's  $R$ ) between the predicted and actual PSTH response. Raw correlation scores were corrected to account for sampling limitations that produce noise in the actual response [38]. A prediction correlation of  $R=1$  indicated perfect prediction accuracy, and a value of  $R=0$  indicated chance performance. Data preprocessing, model fitting, and model validation were performed using the NEMS library in Python [37]. All models were fit and tested using the same estimation and validation data sets. Significant differences in prediction accuracy across the neural population were determined by a Wilcoxon sign test.

### *Stimulus specific adaptation analysis*

Sound-evoked activity recorded during presentation of the oddball noise burst sequences was modeled using the LN STRF, global STP STRF, local STP STRF, and 2 x reweighted STP STRF, as described above. To assess stimulus specific adaptation (SSA), a standard index was used to measure the relative enhancement of responses to oddball versus standard noise bursts [9,10].

$$SI = \frac{\bar{r}_{\text{odd}} - \bar{r}_{\text{std}}}{\bar{r}_{\text{odd}} + \bar{r}_{\text{std}}} \quad (7)$$

Here  $\bar{r}_{\text{odd}}$  and  $\bar{r}_{\text{std}}$  are the average response across bursts of both center frequencies, in the oddball and standard conditions, respectively. Neuronal response was calculated as the integral over time of the PSTH during the sound presentation. Significance of the SSA index (SI) was calculated with a shuffle test in which the identity of tones (oddball or standard) was randomly swapped. To determine how well the STRF models could account for SSA, SI was calculated for model predictions using the same method used for the actual neural responses. We then assessed the accuracy of SI predicted by STRFs in two ways: First we computed the correlation coefficient between actual and predicted SI for all the recorded cells that showed significant SI. Second, as the population mean of the squared difference between the actual and predicted SI calculated individually for each cell.

### *Behavior-dependent STRFs.*

To measure effects of behavioral state on spectro-temporal coding, we estimated *behavior-dependent STRFs*, by allowing some or all of the fit parameters to vary between passive and active behavioral conditions [26]. Having established the efficacy of the reweighted STP STRF for passive-listening data, analysis focused on this architecture for the behavioral data. First, a *behavior-independent STRF* provided a baseline, for which all model parameters were fixed across behavior conditions. Second, a behavior-dependent static nonlinearity allowed parameters of the static nonlinearity (Eq. 2) to vary between behavior states but kept all other parameters fixed between conditions. Third, both the linear filter parameters and static nonlinearity (Eq. 1-2) were allowed to vary between behavior conditions, with reweighting and STP parameters fixed across conditions. Finally, all model parameters were allowed to vary between behavior conditions. Thus, this progression of models explored the benefit of allowing increased influence of changes in behavioral state on spectro-temporal coding.

Behavior-dependent models were fit using a sequential gradient descent algorithm in the NEMS library. All models were initially fit using a behavior-independent model. The specified behavior-dependent parameters were then allowed to vary between behavioral states in a subsequent application of gradient descent. Model performance was compared as for the passive-listening data described above. For each neuron, prediction accuracy was assessed using a validation set drawn from both active and passive conditions, which was excluded from fitting, and was always the same across all models. Significant behavioral effects were indicated by improved prediction correlation for behavior-dependent STRFs over the behavior-independent STRF. Changes in tuning were measured by comparing STRF parameters between behavior conditions.

### *Nonlinear encoding models for natural sounds*

Encoding of natural sounds was modeled using a similar approach as for the vocalization-modulated noise. Here we focused on two models, a baseline LN STRF (Eq. 1-2) and a local STP STRF (Eq. 1-4). Because natural sounds contain spectral features that vary across a large number of spectral channels, a different spectral filtering process was required prior to the STP stage. This was achieved using a reduced-rank STRF, where the full spectro-temporal filter was computed from the product of a small number of spectral and temporal filters [23,77]. For an input spectrogram,  $s(i,t)$ , with  $i=1\dots N$  spectral channels, spectral tuning was modeled with a bank of  $J$  weight vectors,  $w(i,j)$ , each of which computed a linear weighted sum of the input spectrogram,

$$s_N(j, t) = \sum_{i=1}^N w(i, j) s(i, t) \quad (8)$$

The reweighted stimuli,  $s_N(i,j)$ , were provided as inputs to the LN and STP STRFs (see Eqs. 1 and 4, above). Each spectral filter was initialized to have constant weights across channels. Model fitting and testing were performed using the same procedures as for the vocalization-modulated noise data (see above).

## Statistical methods

To test whether the prediction of a model for a single neuron was significantly better than chance (i.e., the model could account for any auditory response), we performed a *permutation test*. The predicted response was shuffled across time 1000 times, and the prediction correlation was calculated for each shuffle. The distribution of shuffled correlations defined a noise floor, and a  $p$  value was defined as the fraction of shuffled correlations greater than the correlation for the actual prediction. The Bonferroni method was used to correct for multiple comparisons when assessing significance across any of multiple models.

To compare performance of two models for a single neuron, we used a *jackknifed  $t$ -test*. The Pearson's correlation coefficient between the actual response and response predicted by each model was calculated for 20 jackknife resamples. We then calculated the mean and standard error on the mean from the jackknifed measures [78]. The prediction of two models was considered significantly different at  $p < 0.05$  if the difference of the means was greater than the sum of the standard errors.

To test whether the calculated SSA Index (SI) was significantly different than chance, we performed a permutation test in which the identity of tones (standards, oddball) was shuffled, and the SI was calculated 1000 times. The real SI value was then compared to the noise floor distributions. Finally, for comparing model performance across collections of neurons, we performed a Wilcoxon signed rank test (*sign test*) between the median prediction correlation across neurons for each model.



# **References**

1. Mesgarani N, Cheung C, Johnson K, Chang EF. Phonetic Feature Encoding in Human Superior Temporal Gyrus. *Science*. 2014;343: 1006–10. doi:10.1126/science.1245994
2. Binder J, Frost JA, Hammeke TA, Bellgowan PSF, Springer JA, Kaufman JN, et al. Human Temporal Lobe Activation by Speech and Nonspeech Sounds. *Cereb Cortex*. 2000;10: 512–528. doi:10.1093/cercor/10.5.512
3. Huetz C, Gourévitch B, Edeline J-M. Neural codes in the thalamocortical auditory system: From artificial stimuli to communication sounds. *Hear Res. Elsevier*; 2011;271: 147–158. doi:10.1016/J.HEARES.2010.01.010
4. Depireux DA, Simon JZ, Klein DJ, Shamma SA. Spectro-temporal response field characterization with dynamic ripples in ferret primary auditory cortex. *J Neurophysiol*. 2001;85: 1220–1234. Available: [http://www.ncbi.nlm.nih.gov/entrez/query.fcgi?cmd=Retrieve&db=PubMed&dopt=Citation&list\\_uids=11247991](http://www.ncbi.nlm.nih.gov/entrez/query.fcgi?cmd=Retrieve&db=PubMed&dopt=Citation&list_uids=11247991)
5. deCharms RC, Blake DT, Merzenich MM. Optimizing sound features for cortical neurons. *Science* (80- ). 1998;280: 1439–1443.
6. Asari H, Zador AM. Long-lasting context dependence constrains neural encoding models in rodent auditory cortex. *J Neurophysiol*. 2009;102: 2638–56. doi:10.1152/jn.00577.2009
7. Klampfl S, David S V, Yin P, Shamma SA, Maass W. A quantitative analysis of information about past and present stimuli encoded by spikes of A1 neurons. *J Neurophysiol*. 2012; doi:10.1152/jn.00935.2011
8. Angeloni C, Geffen M. Contextual modulation of sound processing in the auditory cortex. *Curr Opin Neurobiol. Elsevier Current Trends*; 2018;49: 8–15. doi:10.1016/J.CONB.2017.10.012
9. Ulanovsky N, Las L, Nelken I. Processing of low-probability sounds by cortical neurons. *Nat Neurosci*. 2003;6: 391–398. doi:10.1038/nn1032

- 1 10. Pérez-González D, Malmierca MS. Adaptation in the auditory system: an overview. *Front Integr*  
2 *Neurosci.* 2014;8: 19. doi:10.3389/fnint.2014.00019
- 3 11. Dean I, Harper NS, McAlpine D. Neural population coding of sound level adapts to stimulus  
4 statistics. *Nat Neurosci.* 2005;8: 1684–9. doi:10.1038/nn1541
- 5 12. Rabinowitz NC, Willmore BDB, Schnupp JWH, King AJ. Contrast gain control in auditory cortex.  
6 *Neuron.* Elsevier Inc.; 2011;70: 1178–91. doi:10.1016/j.neuron.2011.04.030
- 7 13. Lesica NA, Grothe B. Dynamic Spectrotemporal Feature Selectivity in the Auditory Midbrain. *J*  
8 *Neurosci.* Society for Neuroscience; 2008;28: 5412–5421. doi:10.1523/JNEUROSCI.0073-  
9 08.2008
- 10 14. David S V, Shamma SA. Integration over multiple timescales in primary auditory cortex. *J*  
11 *Neurosci.* 2013;33: 19154–66. doi:10.1523/JNEUROSCI.2270-13.2013
- 12 15. Rabinowitz NC, Willmore BDB, Schnupp JWH, King AJ. Spectrotemporal contrast kernels for  
13 neurons in primary auditory cortex. *J Neurosci.* 2012;32: 11271–11284.  
14 doi:10.1523/JNEUROSCI.1715-12.2012
- 15 16. Willmore BDB, Schoppe O, King AJ, Schnupp JWH, Harper NS. Incorporating Midbrain  
16 Adaptation to Mean Sound Level Improves Models of Auditory Cortical Processing. *J Neurosci.*  
17 *Society for Neuroscience*; 2016;36: 280–9. doi:10.1523/JNEUROSCI.2441-15.2016
- 18 17. Williamson RS, Ahrens MB, Linden JF, Sahani M. Input-Specific Gain Modulation by Local  
19 Sensory Context Shapes Cortical and Thalamic Responses to Complex Sounds. *Neuron.* 2016;91:  
20 467–481. doi:10.1016/j.neuron.2016.05.041
- 21 18. Tsodyks M, Pawelzik K, Markram H. Neural networks with dynamic synapses. *Neural Comput.*  
22 1998;10: 821–835. Available:  
23 [http://www.ncbi.nlm.nih.gov/entrez/query.fcgi?cmd=Retrieve&db=PubMed&dopt=Citation&list\\_](http://www.ncbi.nlm.nih.gov/entrez/query.fcgi?cmd=Retrieve&db=PubMed&dopt=Citation&list_uids=9573407)  
24 [uids=9573407](http://www.ncbi.nlm.nih.gov/entrez/query.fcgi?cmd=Retrieve&db=PubMed&dopt=Citation&list_uids=9573407)
- 25 19. Natan RG, Briguglio JJ, Mwilambwe-Tshilobo L, Jones SI, Aizenberg M, Goldberg EM, et al.

- Complementary control of sensory adaptation by two types of cortical interneurons. *Elife*. 2015;4. doi:10.7554/eLife.09868
20. Nelken I. Stimulus-specific adaptation and deviance detection in the auditory system: experiments and models. *Biol Cybern*. 2014;108: 655–63. doi:10.1007/s00422-014-0585-7
21. Buonomano D V, Maass W. State-dependent computations: spatiotemporal processing in cortical networks. *Nat Rev Neurosci*. 2009;10: 113–25. doi:10.1038/nrn2558
22. Wu MC-K, David S V, Gallant JL. Complete functional characterization of sensory neurons by system identification. *Annu Rev Neurosci*. 2006;29: 477–505. Available: <http://www.annualreviews.org/doi/abs/10.1146/annurev.neuro.29.051605.113024>
23. Thorson IL, Liénard J, David S V. The essential complexity of auditory receptive fields. Theunissen FE, editor. *PLoS Comput Biol*. National Institute of Standards and Technology; 2015;11: e1004628. doi:10.1371/journal.pcbi.1004628
24. Otazu GH, Tai LH, Yang Y, Zador AM. Engaging in an auditory task suppresses responses in auditory cortex. *Nat Neurosci*. 2009;12: 646–654. Available: [http://www.ncbi.nlm.nih.gov/entrez/query.fcgi?cmd=Retrieve&db=PubMed&dopt=Citation&list\\_uids=19363491](http://www.ncbi.nlm.nih.gov/entrez/query.fcgi?cmd=Retrieve&db=PubMed&dopt=Citation&list_uids=19363491)
25. Fritz JB, Shamma SA, Elhilali M, Klein DJ. Rapid task-related plasticity of spectrotemporal receptive fields in primary auditory cortex. *Nat Neurosci*. 2003;6: 1216–1223. Available: [http://www.ncbi.nlm.nih.gov/entrez/query.fcgi?cmd=Retrieve&db=PubMed&dopt=Citation&list\\_uids=14583754](http://www.ncbi.nlm.nih.gov/entrez/query.fcgi?cmd=Retrieve&db=PubMed&dopt=Citation&list_uids=14583754)
26. Schwartz ZP, David S V. Focal suppression of distractor sounds by selective attention in auditory cortex. *Cereb Cortex*. 2018;28: 323–339. doi:10.1093/cercor/bhx288
27. Kuchibhotla K V, Gill J V, Lindsay GW, Papadoyannis ES, Field RE, Sten TAH, et al. Parallel processing by cortical inhibition enables context-dependent behavior. *Nat Neurosci*. 2016;20: 62–71. doi:10.1038/nn.4436

28. Niwa M, Johnson JS, O'Connor KN, Sutter ML. Active engagement improves primary auditory cortical neurons' ability to discriminate temporal modulation. *J Neurosci*. 2012/07/06. 2012;32: 9323–34. doi:10.1523/JNEUROSCI.5832-11.2012
29. Ding N, Simon JZ. Emergence of neural encoding of auditory objects while listening to competing speakers. *Proc Natl Acad Sci U S A*. 2012/07/04. 2012;2012: 11854–11859. doi:10.1073/pnas.1205381109
30. Mesgarani N, Chang EF. Selective cortical representation of attended speaker in multi-talker speech perception. *Nature*. 2012/04/24. 2012;485: 233–6. doi:10.1038/nature11020
31. Chance FS, Nelson SB, Abbott LF. Synaptic depression and the temporal response characteristics of V1 cells. *J Neurosci*. 1998;18: 4785–4799.
32. Lesica NA, Grothe B. Efficient temporal processing of naturalistic sounds. Soares D, editor. *PLoS One*. Public Library of Science; 2008;3: e1655. doi:10.1371/journal.pone.0001655
33. Klein DJ, Depireux DA, Simon JZ, Shamma SA. Robust spectrotemporal reverse correlation for the auditory system: Optimizing stimulus design. *J Comput Neurosci*. 2000;9: 85–111.
34. Aertsen AM, Johannesma PI. The spectro-temporal receptive field. A functional characteristic of auditory neurons. *Biol Cybern*. 1981;42: 133–143. Available: [http://www.ncbi.nlm.nih.gov/entrez/query.fcgi?cmd=Retrieve&db=PubMed&dopt=Citation&list\\_uids=7326288](http://www.ncbi.nlm.nih.gov/entrez/query.fcgi?cmd=Retrieve&db=PubMed&dopt=Citation&list_uids=7326288)
35. David S V, Mesgarani N, Fritz JB, Shamma SA. Rapid synaptic depression explains nonlinear modulation of spectro-temporal tuning in primary auditory cortex by natural stimuli. *J Neurosci*. 2009;29: 3374–3386. Available: [http://www.ncbi.nlm.nih.gov/entrez/query.fcgi?cmd=Retrieve&db=PubMed&dopt=Citation&list\\_uids=19295144](http://www.ncbi.nlm.nih.gov/entrez/query.fcgi?cmd=Retrieve&db=PubMed&dopt=Citation&list_uids=19295144)
36. Byrd RH, Lu P, Nocedal J, Zhu C. A Limited Memory Algorithm for Bound Constrained Optimization. *SIAM J Sci Comput*. 1995;16: 1190–1208. doi:10.1137/0916069

- 1 37. David S V. Neural Encoding Model System (NEMS) [Internet]. 2018 [cited 10 Mar 2018].  
2 Available: <https://github.com/LBHB/NEMS>
- 3 38. Hsu A, Borst A, Theunissen FE. Quantifying variability in neural responses and its application for  
4 the validation of model predictions. *Netw Comput Neural Syst*. 2004;15: 91–109.
- 5 39. Gao X, Wehr M. A Coding Transformation for Temporally Structured Sounds within Auditory  
6 Cortical Neurons. *Neuron*. 2015; doi:10.1016/j.neuron.2015.03.004
- 7 40. Eggermont JJ. Context dependence of spectro-temporal receptive fields with implications for  
8 neural coding. *Hear Res. Elsevier*; 2011;271: 123–132. doi:10.1016/j.heares.2010.01.014
- 9 41. Mesgarani N, David S V, Fritz JB, Shamma SA. Mechanisms of noise robust representation of  
10 speech in primary auditory cortex. *Proc Natl Acad Sci U S A*. 2014;111: 6792–7.  
11 doi:10.1073/pnas.1318017111
- 12 42. Rabinowitz NC, Willmore BDB, King AJ, Schnupp JWH. Constructing noise-invariant  
13 representations of sound in the auditory pathway. *PLoS Biol*. 2013;11: e1001710.  
14 doi:10.1371/journal.pbio.1001710
- 15 43. Moore RC, Lee T, Theunissen FE. Noise-invariant neurons in the avian auditory cortex: hearing  
16 the song in noise. *PLoS Comput Biol*. 2013;9: e1002942. doi:10.1371/journal.pcbi.1002942
- 17 44. Rothman JS, Cathala L, Steuber V, Silver RA. Synaptic depression enables neuronal gain control.  
18 *Nature*. Nature Publishing Group; 2009;457: 1015–1018. doi:10.1038/nature07604
- 19 45. Nagel KI, Doupe AJ. Organizing principles of spectro-temporal encoding in the avian primary  
20 auditory area field L. *Neuron*. 2008;58: 938–955. Available:  
21 [http://www.ncbi.nlm.nih.gov/entrez/query.fcgi?cmd=Retrieve&db=PubMed&dopt=Citation&list\\_](http://www.ncbi.nlm.nih.gov/entrez/query.fcgi?cmd=Retrieve&db=PubMed&dopt=Citation&list_uids=18579083)  
22 [uids=18579083](http://www.ncbi.nlm.nih.gov/entrez/query.fcgi?cmd=Retrieve&db=PubMed&dopt=Citation&list_uids=18579083)
- 23 46. Dean I, Robinson BL, Harper NS, McAlpine D. Rapid neural adaptation to sound level statistics. *J*  
24 *Neurosci*. 2008;28: 6430–8. doi:10.1523/JNEUROSCI.0470-08.2008
- 25 47. Ulanovsky N, Las L, Farkas D, Nelken I. Multiple time scales of adaptation in auditory cortex

- neurons. J Neurosci. 2004;24: 10440–10453. Available:  
[http://www.ncbi.nlm.nih.gov/entrez/query.fcgi?cmd=Retrieve&db=PubMed&dopt=Citation&list\\_uids=15548659](http://www.ncbi.nlm.nih.gov/entrez/query.fcgi?cmd=Retrieve&db=PubMed&dopt=Citation&list_uids=15548659)
48. Keine C, Rübsamen R, Englitz B. Inhibition in the auditory brainstem enhances signal representation and regulates gain in complex acoustic environments. Elife. 2016;5. doi:10.7554/eLife.19295
49. Kudela P, Boatman-Reich D, Beeman D, Stanley Anderson W, Carr C, Lee Bartlett E. Modeling Neural Adaptation in Auditory Cortex. Front Neural Circuits. Frontiers; 2018;12: 72. doi:10.3389/fncir.2018.00072
50. Wehr M, Zador AM. Balanced inhibition underlies tuning and sharpens spike timing in auditory cortex. Nature. 2003;426: 442–446. Available:  
[http://www.ncbi.nlm.nih.gov/entrez/query.fcgi?cmd=Retrieve&db=PubMed&dopt=Citation&list\\_uids=14647382](http://www.ncbi.nlm.nih.gov/entrez/query.fcgi?cmd=Retrieve&db=PubMed&dopt=Citation&list_uids=14647382)
51. Froemke RC, Merzenich MM, Schreiner CE. A synaptic memory trace for cortical receptive field plasticity. Nature. 2007;450: 425–429. Available:  
[http://www.ncbi.nlm.nih.gov/entrez/query.fcgi?cmd=Retrieve&db=PubMed&dopt=Citation&list\\_uids=18004384](http://www.ncbi.nlm.nih.gov/entrez/query.fcgi?cmd=Retrieve&db=PubMed&dopt=Citation&list_uids=18004384)
52. Chi T, Ru P, Shamma SA. Multiresolution spectrotemporal analysis of complex sounds. J Acoust Soc Am. 2005;118: 887–906. Available:  
[http://www.ncbi.nlm.nih.gov/entrez/query.fcgi?cmd=Retrieve&db=PubMed&dopt=Citation&list\\_uids=16158645](http://www.ncbi.nlm.nih.gov/entrez/query.fcgi?cmd=Retrieve&db=PubMed&dopt=Citation&list_uids=16158645)
53. Schinkel-Bielefeld N, David S V, Shamma SA, Butts DA. Inferring the role of inhibition in auditory processing of complex natural stimuli. J Neurophysiol. 2012;107: 3296–3307. doi:10.1152/jn.01173.2011
54. Watkins P V, Barbour DL. Rate-level responses in awake marmoset auditory cortex. Hear Res. 2011;275: 30–42. doi:10.1016/j.heares.2010.11.011

55. Bendor D. The Role of Inhibition in a Computational Model of an Auditory Cortical Neuron during the Encoding of Temporal Information. 2015; Available: <http://dx.plos.org/10.1371/journal.pcbi.1004197>
56. Gao L, Kostlan K, Wang Y, Wang X. Distinct Subthreshold Mechanisms Underlying Rate-Coding Principles in Primate Auditory Cortex. *Neuron*. Cell Press; 2016;91: 905–919. doi:10.1016/j.neuron.2016.07.004
57. See JZ, Atencio CA, Sohal VS, Schreiner CE. Coordinated neuronal ensembles in primary auditory cortical columns. *Elife*. 2018;7. doi:10.7554/eLife.35587
58. Stringer C, Pachitariu M, Steinmetz N, Carandini M, Harris KD. High-dimensional geometry of population responses in visual cortex. *bioRxiv*. Cold Spring Harbor Laboratory; 2018; 374090. doi:10.1101/374090
59. Pillow JW, Shlens J, Paninski L, Sher A, Litke AM, Chichilnisky EJ, et al. Spatio-temporal correlations and visual signalling in a complete neuronal population. *Nature*. 2008;454: 995–9. doi:10.1038/nature07140
60. David S V. Incorporating behavioral and sensory context into spectro-temporal models of auditory encoding. *Hear Res*. 2018;360: 107–123. doi:10.1016/j.heares.2017.12.021
61. Fritz JB, Elhilali M, David S V, Shamma SA. Does attention play a role in dynamic receptive field adaptation to changing acoustic salience in A1? *Hear Res*. 2007;229: 186–203. Available: [http://www.ncbi.nlm.nih.gov/entrez/query.fcgi?cmd=Retrieve&db=PubMed&dopt=Citation&list\\_uids=17329048](http://www.ncbi.nlm.nih.gov/entrez/query.fcgi?cmd=Retrieve&db=PubMed&dopt=Citation&list_uids=17329048)
62. Mesgarani N, Fritz JB, Shamma SA. A computational model of rapid task-related plasticity of auditory cortical receptive fields. *J Comput Neurosci*. 2010;28: 19–27. doi:10.1007/s10827-009-0181-3
63. Rui YY, He J, Zhai YY, Sun Z-H, Yu XJ. Frequency-Dependent Stimulus-Specific Adaptation and Regularity Sensitivity in the Rat Auditory Thalamus. *Neuroscience*. Pergamon; 2018;392: 13–24. doi:10.1016/j.neuroscience.2018.09.015

64. Garofolo JS. Getting started with the DARPA TIMIT CD-ROM: An acoustic phonetic continuous speech database. Gaithersburg, Maryland: National Institute of Standards and Technology; 1988.
65. Singh NC, Theunissen FE. Modulation spectra of natural sounds and ethological theories of auditory processing. *J Acoust Soc Am*. 2003;114: 3394–3411. Available: [http://www.ncbi.nlm.nih.gov/entrez/query.fcgi?cmd=Retrieve&db=PubMed&dopt=Citation&list\\_uids=14714819](http://www.ncbi.nlm.nih.gov/entrez/query.fcgi?cmd=Retrieve&db=PubMed&dopt=Citation&list_uids=14714819)
66. Englitz B, David S V, Sorenson MD, Shamma SA. MANTA-an open-source, high density electrophysiology recording suite for MATLAB. *Front Neural Circuits*. Switzerland; 2013;7: 69. doi:10.3389/fncir.2013.00069
67. Atiani S, David S V, Elgueda D, Locastro M, Radtke-Schuller S, Shamma SA, et al. Emergent selectivity for task-relevant stimuli in higher-order auditory cortex. *Neuron*. 2014;82: 486–499. doi:10.1016/j.neuron.2014.02.029
68. Shamma SA, Fleshman JW, Wiser PR, Versnel H. Organization of response areas in ferret primary auditory cortex. *J Neurophysiol*. 1993;69: 367–83. Available: <http://www.ncbi.nlm.nih.gov/pubmed/8459273>
69. Heffner HE, Heffner RS. Conditioned Avoidance. In: Klump GM, Dooling RJ, Fay RR, Stebbins WC, editors. *Methods in Comparative Psychoacoustics*. Basel: Birkhauser Verlag; 1995. pp. 79–93.
70. Yin P, Fritz JB, Shamma SA. Do ferrets perceive relative pitch? *J Acoust Soc Am*. 2010;127: 1673–1680. Available: [http://www.ncbi.nlm.nih.gov/entrez/query.fcgi?cmd=Retrieve&db=PubMed&dopt=Citation&list\\_uids=20329865](http://www.ncbi.nlm.nih.gov/entrez/query.fcgi?cmd=Retrieve&db=PubMed&dopt=Citation&list_uids=20329865)
71. Theunissen FE, David S V, Singh NC, Hsu A, Vinje WE, Gallant JL. Estimating spatial temporal receptive fields of auditory and visual neurons from their responses to natural stimuli. *Netw Comput Neural Syst*. 2001;12: 289–316.
72. Machens CK, Wehr MS, Zador AM. Linearity of cortical receptive fields measured with natural



- 1 sounds. *J Neurosci.* 2004;24: 1089–1100. Available:  
2 [http://www.ncbi.nlm.nih.gov/entrez/query.fcgi?cmd=Retrieve&db=PubMed&dopt=Citation&list\\_](http://www.ncbi.nlm.nih.gov/entrez/query.fcgi?cmd=Retrieve&db=PubMed&dopt=Citation&list_)  
3 [uids=14762127](http://www.ncbi.nlm.nih.gov/entrez/query.fcgi?cmd=Retrieve&db=PubMed&dopt=Citation&list_uids=14762127)
- 4 73. Radtke-Schuller S, Fritz JB, Yin P, David S V, Shamma SA. A neuroanatomical study of frontal  
5 cortical areas in the ferret (*Mustela putorius*) and their role in top-down control of auditory  
6 processing. 3rd International Meeting on Auditory Cortex, Magdeburg, Germany. 2009.
- 7 74. Calabrese A, Schumacher JW, Schneider DM, Paninski L, Woolley SMN. A generalized linear  
8 model for estimating spectrotemporal receptive fields from responses to natural sounds. *PLoS*  
9 *One.* 2011;6: e16104. doi:10.1371/journal.pone.0016104
- 10 75. Paninski L, Pillow JW, Simoncelli EP. Maximum likelihood estimation of a stochastic integrate-  
11 and-fire neural encoding model. *Neural Comput.* 2004;16: 2533–61.  
12 doi:10.1162/0899766042321797
- 13 76. Atencio CA, Sharpee TO, Schreiner CE. Cooperative nonlinearities in auditory cortical neurons.  
14 *Neuron.* 2008;58: 956–966. Available:  
15 [http://www.ncbi.nlm.nih.gov/entrez/query.fcgi?cmd=Retrieve&db=PubMed&dopt=Citation&list\\_](http://www.ncbi.nlm.nih.gov/entrez/query.fcgi?cmd=Retrieve&db=PubMed&dopt=Citation&list_)  
16 [uids=18579084](http://www.ncbi.nlm.nih.gov/entrez/query.fcgi?cmd=Retrieve&db=PubMed&dopt=Citation&list_uids=18579084)
- 17 77. Simon JZ, Depireux DA, Klein DJ, Fritz JB, Shamma SA. Temporal symmetry in primary  
18 auditory cortex: implications for cortical connectivity. *Neural Comput.* 2007;19: 583–638.  
19 doi:10.1162/neco.2007.19.3.583
- 20 78. Efron B, Tibshirani R. Bootstrap methods for standard errors, confidence intervals, and other  
21 measures of statistical accuracy. *Stat Sci.* 1986;1: 54–77.

# Figures

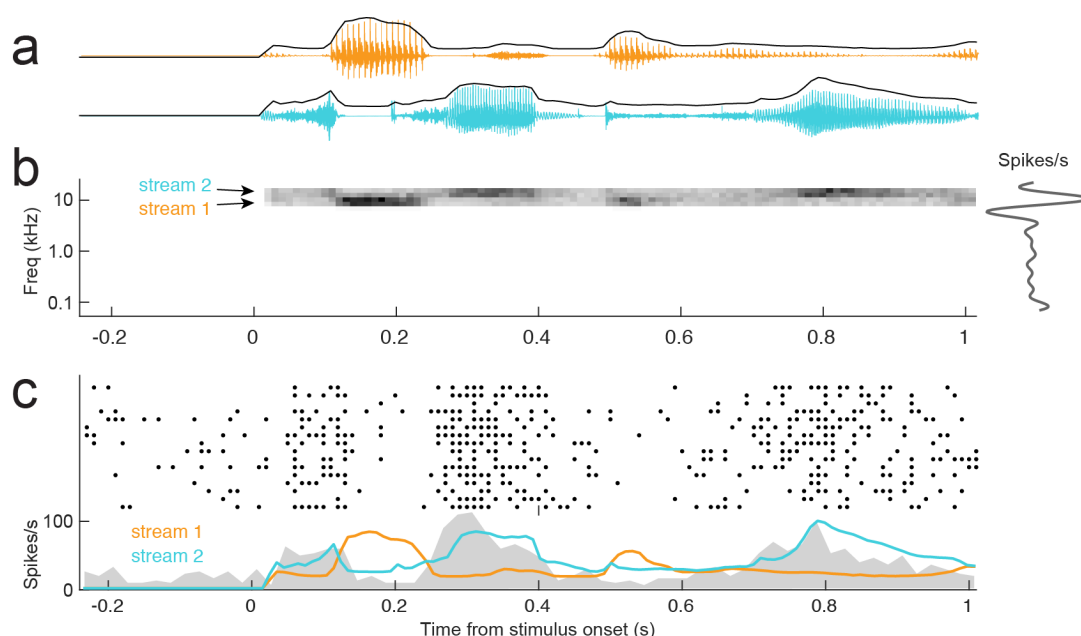

**Figure 1. A.** Two example natural vocalization waveforms show characteristic interspersed epochs of high sound energy and silence. **B.** Each sound has a distinct envelope tracing amplitude over time, which captures these complex temporal dynamics. **C.** Spectrogram of vocalization-modulated noise presented to one A1 neuron. Stimuli were generated by applying vocalization envelopes to narrowband noise, thus capturing the complex temporal dynamics of natural sounds. For the two-band stimulus, a different envelope was applied to adjacent, non-overlapping spectral bands, both positioned in the responsive area of a frequency tuning curve measured using pure tones and/or brief noise bursts (frequency tuning curve shown at left). Thus vocalization-modulated noise enabled probing natural, nonlinear temporal processing while minimizing complexity of spectral features. **D.** Raster response of a neuron to repeated presentations of the vocalization-modulated noise stimulus (top), and peri-stimulus time histogram (PSTH) response averaged across repetitions (gray shading, bottom). PSTH responses predicted by the linear-nonlinear (orange, LN) and reweighted short-term plasticity (purple, RW STP) STRF estimates for this neuron are overlaid. Prediction accuracy of each model was measured as the correlation coefficient between predicted and actual PSTH. Response transients predicted more accurately by the RW STP STRF are indicated by arrows.

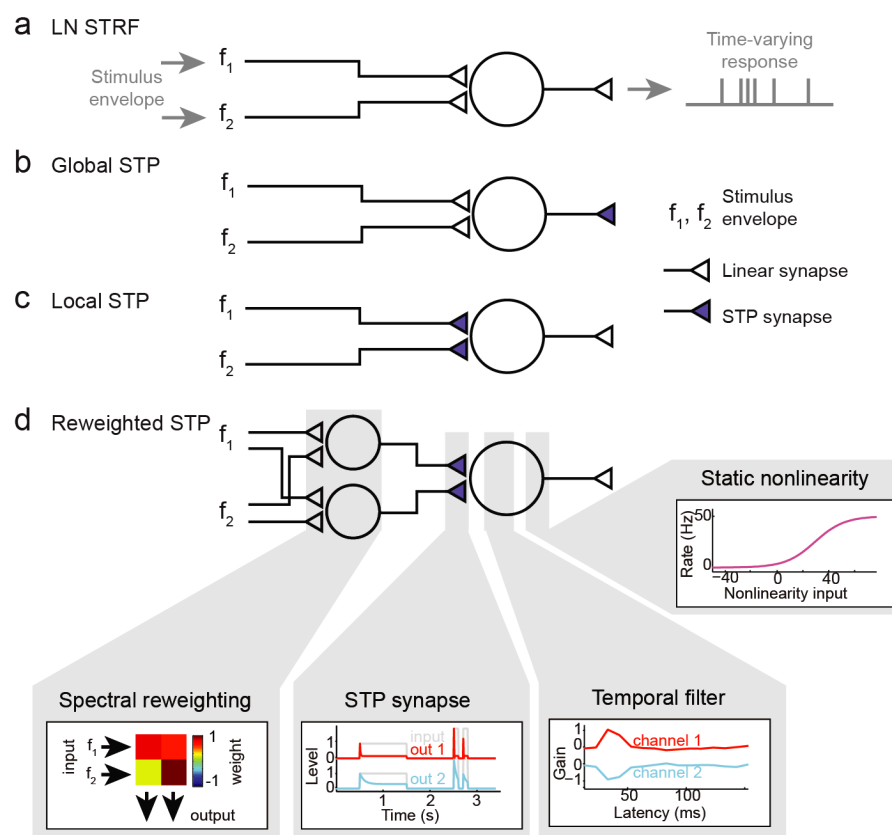

**Figure 2.** Alternative encoding models to describe auditory neural responses to vocalization-modulated noise. **A.** The linear-nonlinear spectro-temporal receptive field (LN STRF) describes the time-varying neural response as a linear weighted sum of the preceding stimulus envelopes, followed by a static sigmoid nonlinearity to account for spike threshold and saturation. **B.** In the global short-term plasticity (STP) STRF, nonlinear STP (depression or facilitation) is applied to the output of the linear filter prior to the static nonlinearity. **C.** In the local STP STRF, STP is applied to each input prior to the linear filter, allowing separate adaptation for each input channel. **D.** In the reweighted (RW) STP STRF, the input channels are linearly reweighted prior to local STP.

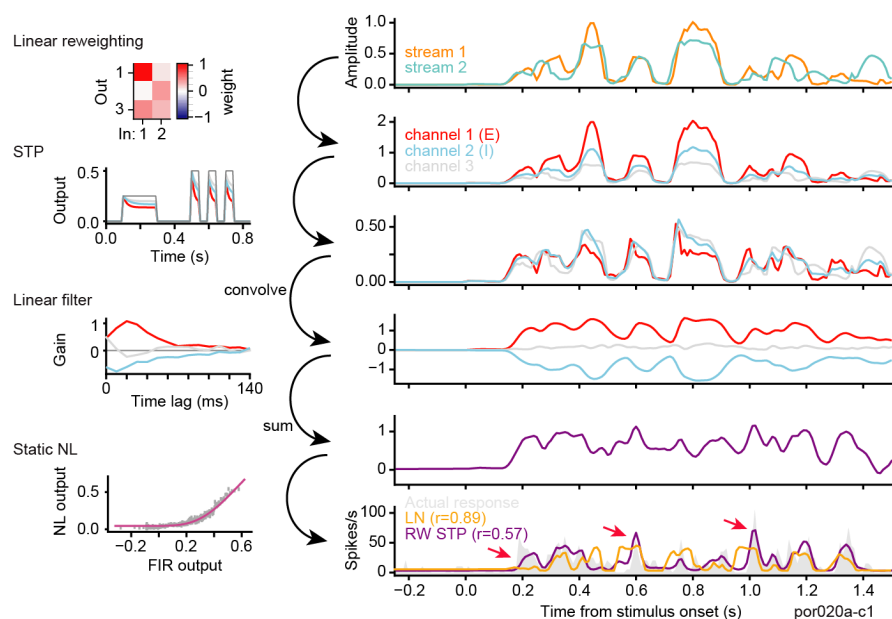

**Figure 3.** Transformation applied to incoming vocalization-modulated noise for an example reweighted short-term plasticity (RW STP) STRF. Spectral reweighting emphasized input stream 1 in channel 1 (red), stream 2 in channel 2 (blue), and both streams in channel 3 (gray). All three reweighted channels then undergo independent STP. For this neuron, STP is stronger for channel 1 than for the other channels. The linear filter produces excitation for channel 1 and inhibition for channel 2. After the final static nonlinearity (NL), the predicted PSTH (bottom panel, purple) shows a good match to the actual PSTH (gray shading), while the prediction of the LN STRF does not predict the response dynamics as accurately (orange). Arrows indicate PSTH features captured better by the STP STRF.

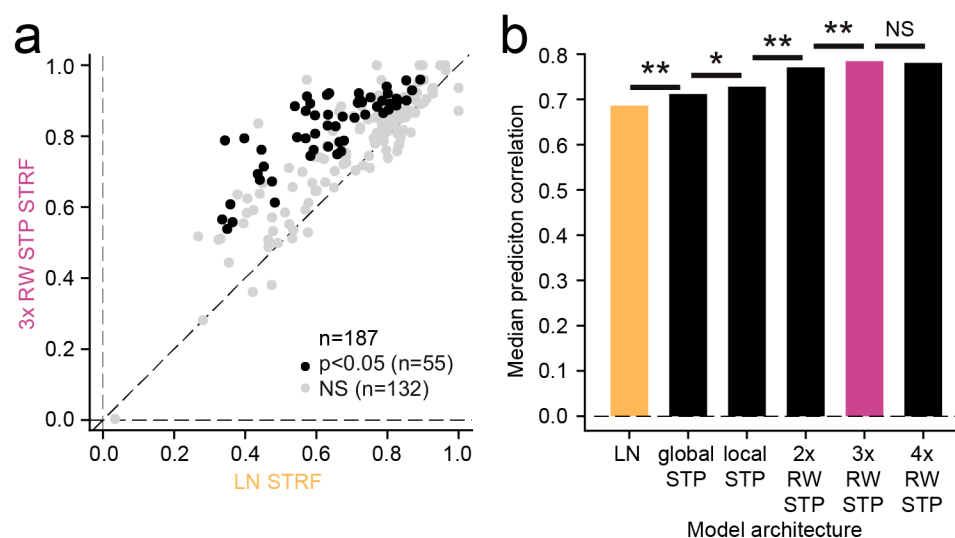

**Figure 4. A.** Scatter plot compares noise-corrected prediction correlation between the linear-nonlinear (LN) STRF and reweighted short-term plasticity (RW STP) STRF for each A1 neuron. Black points indicate the 55/187 neurons for which the reweighted STP model performed significantly better than the LN model ( $p < 0.05$ , jackknifed  $t$ -test). **B.** Median performance for each model across the set of A1 neurons. Each increasingly complex model, but the last, showed a significant improvement in prediction correlation in relation with the previous ( $**p < 1.0 \times 10^{-4}$ , NS  $p > 0.5$ , Wilcoxon sign test,  $n = 187/200$  neurons with above-chance prediction correlation for any model). The best performing model, the 3xRW STP STRF, reweighted the input envelopes into three spectral channels, each of which underwent independent STP prior to linear filtering and a static nonlinearity.

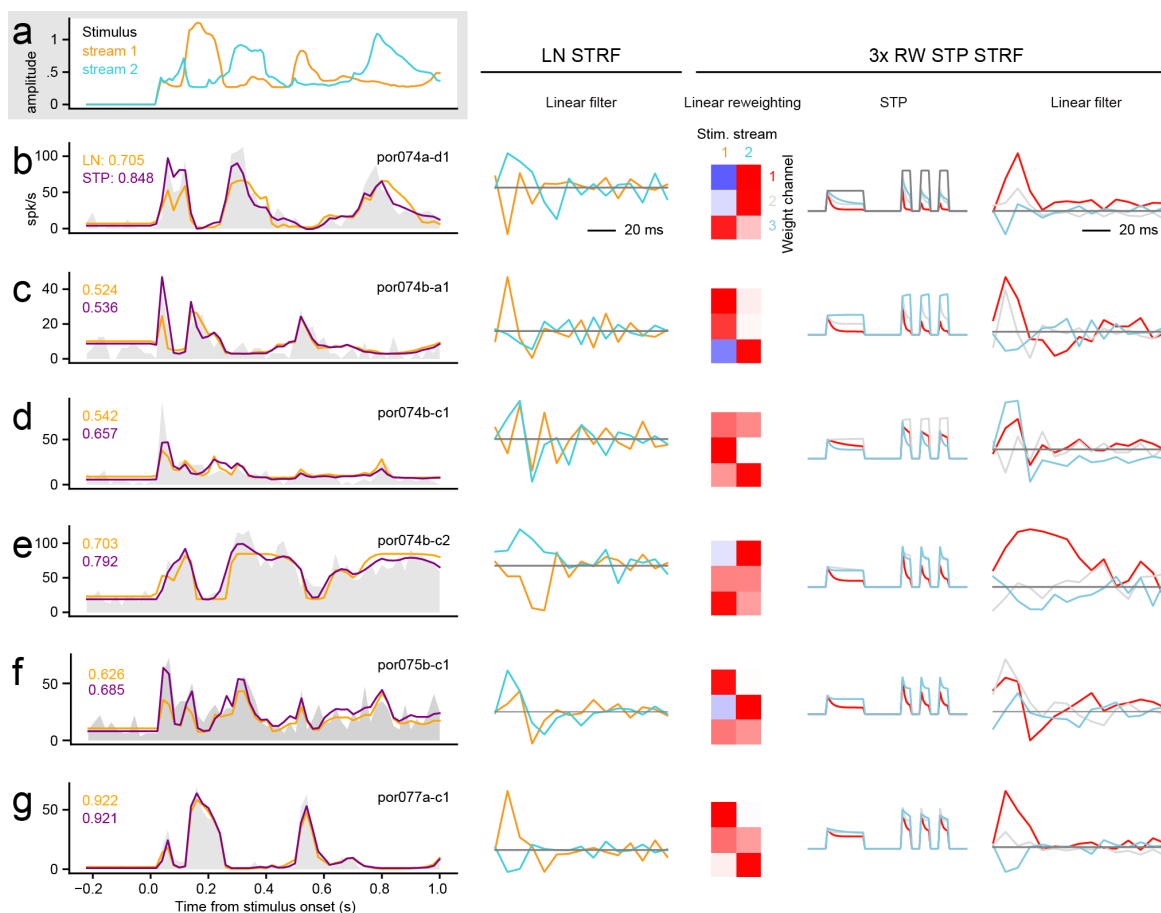

**Figure 5. A.** Envelope of vocalization-modulated noise streams played to several neurons. **B-G.** Left column, example PSTH responses of several A1 neurons (gray shading). The spectral position of noise bands was adjusted to fall within the receptive field of each neuron, but the sound envelopes were the same for each. Responses were sometimes dominated by one stream (e.g., unit C tracks stream 1 and G tracks stream 2), but could also track both (e.g., unit F). Response dynamics also vary substantially, from sustained, following the stimulus envelope (G), to highly transient responses that attenuate after sound onset (D). Numbers at upper left of PSTH plots indicate prediction correlation by the linear-nonlinear (LN) STRF (orange) and reweighted short-term plasticity (3x RW STP) STRF (purple). Predicted PSTHs are overlaid on the actual PSTH. Second column shows linear filters from the LN STRF for each neuron, whose gain reciprocates the PSTH responses. Columns at right show the spectral weights, adaptation properties and linear filters for the 3x RW STP STRFs of the same neurons, plotted as in Fig. 3. STP and linear filter plots for the highest gain channel for each neuron are in red, and plots for the lowest gain channel are in blue.

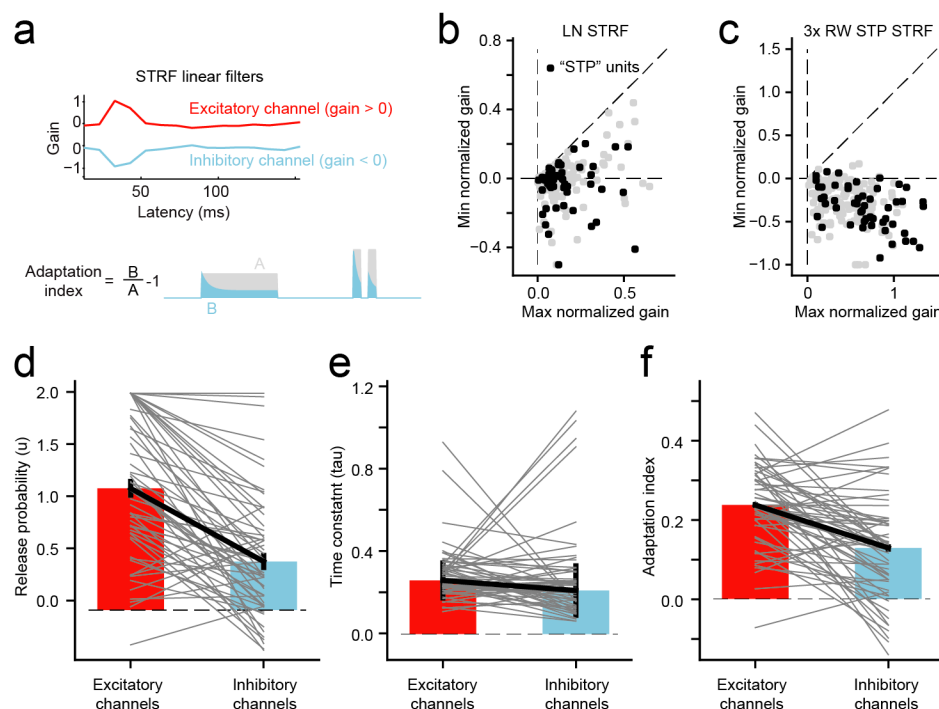

**Figure 6. A.** In the local- and reweighted (RW) STP STRFs, each reweighted channel passed through a nonlinear filter, mimicking synaptic STP, a nonlinear transformation, prior to the linear filter stage. An index of adaptation strength for each model synapse was computed as the one minus the fraction change in the amplitude of a test signal after passing through the adapting synapse. An index value  $> 0$  indicated synaptic depression, and a value  $< 0$  indicated facilitation. **B.** Overall gain for each channel of the linear filter in the LN STRF was computed as the sum of the filter across time lags. Scatter plot compares gain for the channel with largest magnitude, which was always positive (horizontal axis), and for the channel with smallest magnitude, which was either positive or negative (vertical axis). **C.** Comparison of linear filter gain for the 3x RW STP STRF, plotted as in B. For this model, that vast majority of STRFs contained at least one excitatory (positive) channel and one inhibitory (negative) channel ( $n=198/200$ ). Units in which 3xRW STP STRF generated a significant improvement in prediction power are colored black ( $n=57$ ,  $p<0.05$ , jackknife  $t$ -test). **D.** Comparison of release probability parameter fit values for STP filters in excitatory versus inhibitory channels ( $n=57$  STP STRFs with significant improvement in prediction power). Gray lines connect values for a single STRF. Average values were significantly greater for excitatory versus inhibitory synapses for release probability (mean 1.18 vs. 0.40,  $p=1.4 \times 10^{-6}$ , sign test). **E.** Comparison of

- 1 STP recovery time constant, plotted as in D, shows no difference between excitatory and inhibitory channels
- 2 (mean 0.22 vs. 0.20,  $p>0.5$ , sign test). **F.** Comparison of adaptation index shows a significant difference
- 3 between excitatory and inhibitory channels (mean 0.23 vs. 0.12,  $p=2.8 \times 10^{-4}$  sign test).



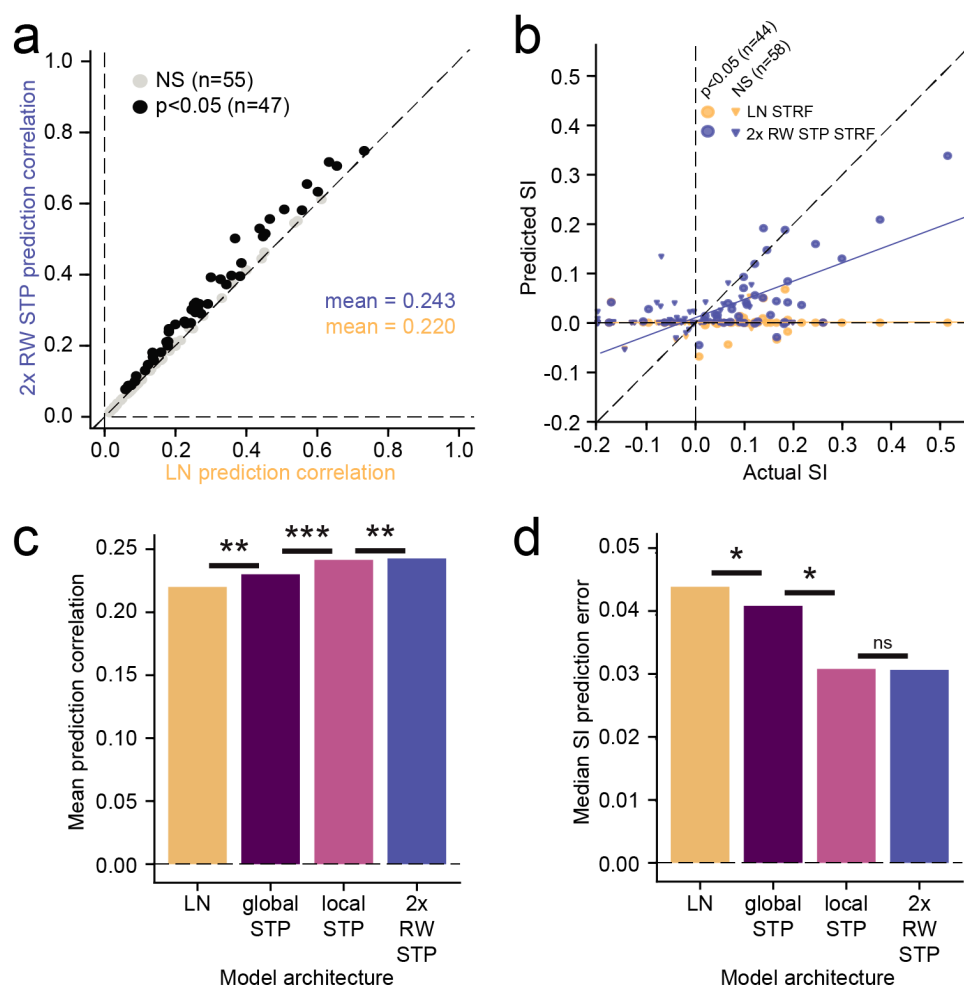

**Figure 7. A.** Scatter plot compares prediction accuracy for the worst (LN) and best (2x reweighted STP STRF) models, estimated for oddball stimuli for each neuron (marker). Marker color indicate significant difference in the performance between models ( $p < 0.05$ , jackknifed  $t$ -test). **B.** Scatter plot compares actual SSA index (SI) versus SI predicted by LN and 2x reweighted STP STRFs for each neuron. Colors indicate the model, circles and triangles indicate cells with a significant or not significant recorded SI respectively (standard/oddball shuffle test  $p < 0.05$ ). Neurons with significant SI were used to calculate linear regression lines. The LN STRF is unable to account for any stimulus specific adaptation, while the SI predicted by the 2x RW STP STRFs is correlated with the actual values (LN, orange:  $r = 0.011$ ,  $p = 0.95$ ; 2xRW STP STRF, blue:  $r = 0.636$ ,  $p = 3.4 \times 10^{-6}$ , Wald Test with  $t$ -distribution of the slope). **C.** Summary of the mean correlation coefficient for all cells across all tested models (LN vs. global STP STRF,  $p = 1.7 \times 10^{-4}$ , Global STP STRF vs. local STP STRF,  $p = 1.9 \times 10^{-12}$ , Local STP STRF vs. 2xRW STP STRF,  $p = 0.0022$ , sign

1 test). **D.** Summary of the mean SI prediction error for the cell population, across all model architectures.  
2 The prediction error for individual cells is the mean standard error (MSE) between actual and predicted SI  
3 (LN vs. global STP STRF,  $p=0.024$ . Global STP STRF vs. local STP STRF,  $p=0.017$ , Local STP STRF vs.  
4 2xRW STP STRF,  $p=0.93$ , LN vs. 2xRW STP STRF,  $p=1.5 \times 10^{-4}$ , sign test). Legend:  $*p<0.05$ ,  $**p<0.01$ ,  
5  $***p<0.001$ .

6

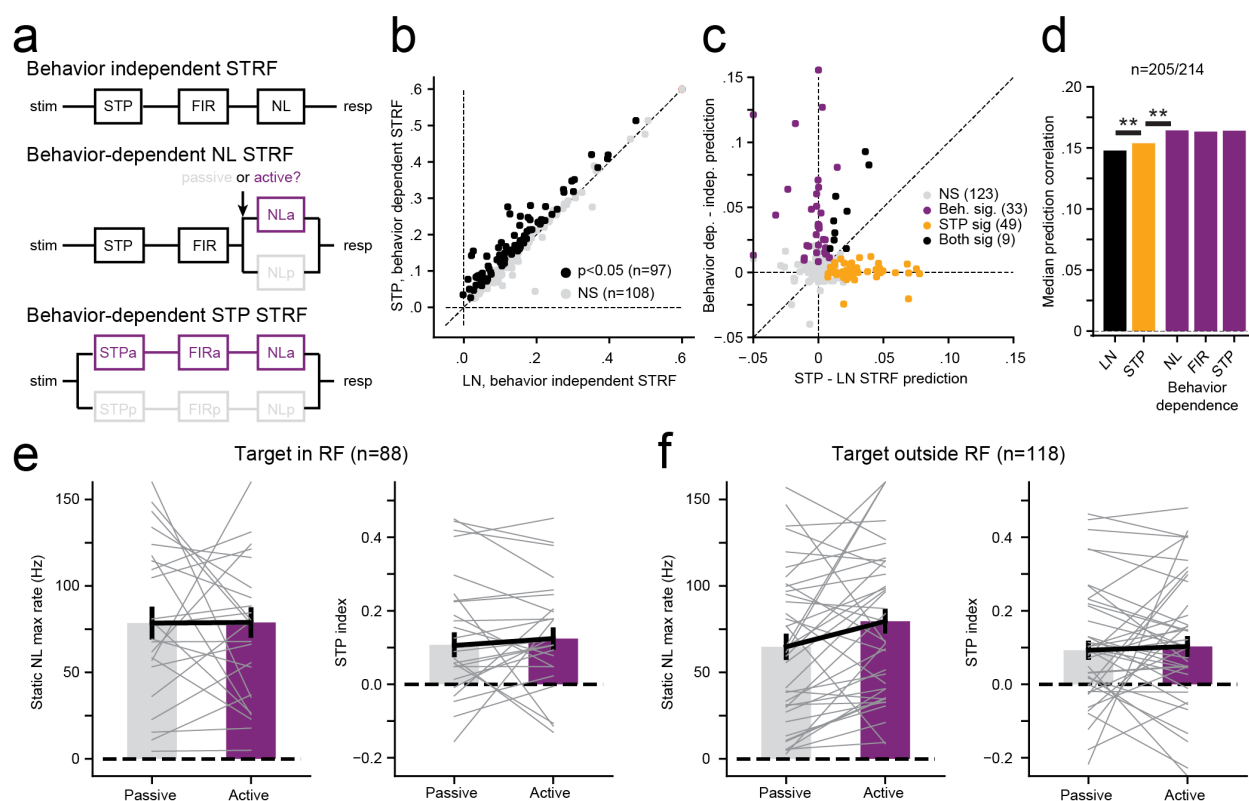

**Figure 8. A.** Schematic of alternative behavior-dependent local STP STRF models to account for changes in sound encoding between passive and active tone detection conditions. In separate behavioral blocks the target was either presented in the noise band at the neuron's best frequency (BF) or in the band away from BF. The behavior-independent model was fit independent of behavior state. For the behavior-dependent NL model, the static nonlinearity was fit separately for passive and active conditions but all other parameters were constant. Subsequent models introduced the active/passive split prior to earlier stages. **B.** Scatter plot compares prediction accuracy between the behavior-independent LN STRF and full behavior-dependent STP STRF for each cell in the set (pooled across on BF and away from BF target blocks). 97/205 neurons show a significant increase in prediction accuracy for the behavior-dependent model ( $p < 0.05$ , jackknifed  $t$ -test). **C.** Relative improvement in prediction accuracy from incorporating STP (LN vs. STP STRF, x axis) versus incorporating behavior dependence (behavior independent vs. -dependent, y axis). The small number of units that show improvement for both models (black), is in the range expected by chance if STP and behavior effects are distributed independently across the A1 population ( $p > 0.2$ , permutation test). **D.** Comparison of mean prediction accuracy for each model reveals a significant increase

in performance for STP STRF over the LN STRF, as in the previous dataset. In addition, for the STP STRF, the behavior-dependent NL model shows improve performance over the behavior-independent model (in RF: median 0.14 vs. 0.16,  $p=1.2 \times 10^{-7}$ , outside RF: median 0.13 vs. 0.15,  $p=2.2 \times 10^{-7}$ , sign test). However, no further improvement is observed if the linear filter or STP parameters are made behavior-dependent ( $p>0.05$ , sign test). The same pattern is observed for in-RF data and outside-RF data, for which the target was outside of the neuron's receptive field. **E.** Comparison of passive vs. active STRF gain (amplitude of the static nonlinearity) and STP index between active and passive conditions for in-RF data shows no significant change in the mean value of either parameter (NL amplitude 78 vs. 79 spikes/sec,  $p > 0.5$ ; STP: mean 0.11 vs. 0.12,  $p=0.08$ ; sign test). Data are plotted as in Fig. 6c. **F.** Comparison of STRF gain and STP magnitude for outside RF behavior shows a significant decrease in gain during the active condition (NL amplitude 65 vs. 80 spikes/sec,  $p=5.0 \times 10^{-4}$ , sign test) but no change in STP strength (mean 0.09 vs. 0.10,  $p > 0.2$ ).

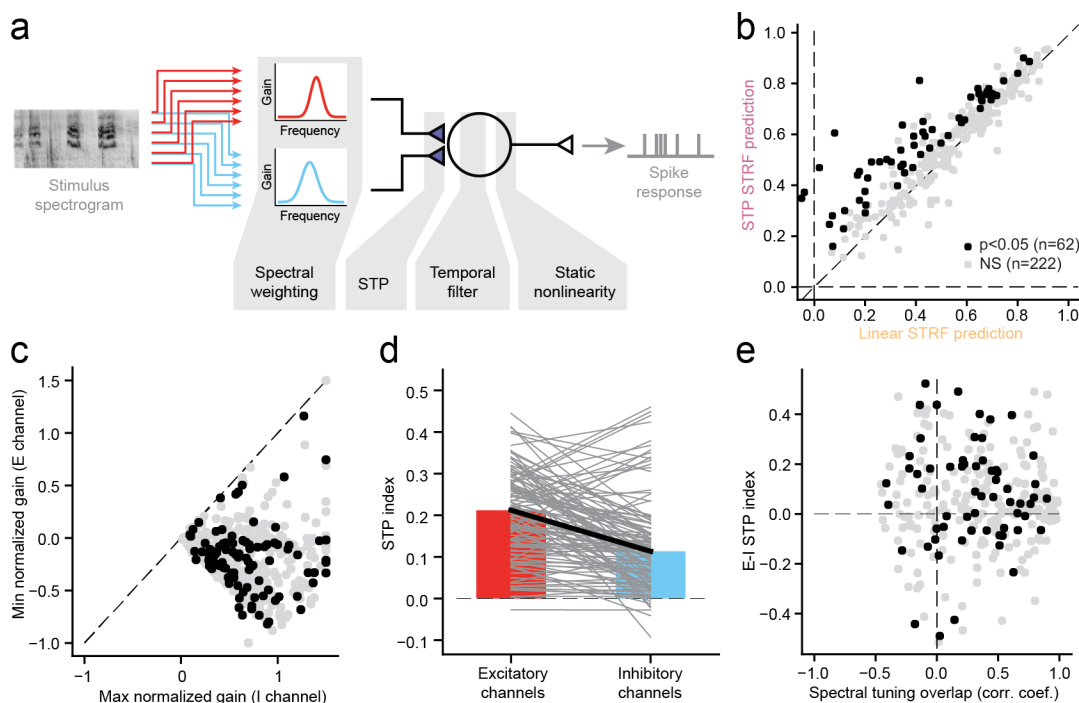

**Figure 9.** Performance of a local STP model on for A1 encoding of natural sounds. **A.** The encoding model for natural sounds resembled reweighted STP STRF for vocalization-modulated noise, except that the spectral filters at the first stage were two independently fit Gaussian functions that spanned the 18 channels of the stimulus spectrogram. **B.** Scatter plot compares prediction accuracy between the LN STRF and local STP STRF for the natural sound data. Across the entire set, 62/284 neurons showed a significant improvement in prediction accuracy for the local STP STRF ( $p < 0.05$ , jackknife  $t$ -test). Mean prediction accuracy for the local STP STRF was significantly greater than the LN STRF (0.525 vs. 0.573,  $p=6.3 \times 10^{-20}$ , sign test). **C.** Comparison of gain for the two linear filter channels for STP STRFs reveals that the majority fits contain one excitatory and one inhibitory channel. **D.** Comparison of STP strength between excitatory and inhibitory channels shows consistently stronger depression for the excitatory channels (mean 0.21 vs. 0.11,  $p=0.012$ , sign test,  $n=62$  units with significant improvement for the STP STRF). **E.** Scatter plot compares overlap of E and I spectral channels for each STP STRF (x axis) and relative difference in STP index between the E and I channels. E and I spectral tuning are generally correlated (most points  $> 0$ ). There is no correlation between tuning overlap and STP index difference, suggesting that A1 neurons represent incoming sound with a diverse combination of spectral tuning and nonlinear adaptation.
